# Supplementary material for: Analysis of Time to Diagnosis and Outcomes Among Adults With Primary Hyperparathyroidism
Source: PubMed Central journal article supplement (PMC9857508; doi:10.1001/jamanetworkopen.2022.48332), 2022-12-27
Supplement: jamanetwopen-e2248332-s001.pdf [file jamanetwopen-e2248332-s001.pdf]

## Supplemental Online Content

Lorenz FJ, Beauchamp-Perez F, Manni A, Chung T, Goldenberg D, Goyal N. Analysis of time to diagnosis and outcomes among adults with primary hyperparathyroidism. *JAMA Netw Open*. 2022;5(12):e2248332. doi:10.1001/jamanetworkopen.2022.48332

### **eMethods.** Diagnosis (*ICD-10*) and Procedure (*CPT*) Codes

**eTable 1.** Associated Diagnoses and Symptoms in Patients in the First (Hypercalcemia and PTH  $\geq 50$  pg/mL Without a Documented Diagnosis) (n = 20,176) and Second (Unexplained Hypercalcemia and No Further Workup) (n = 24,905) High-risk Groups for PHP

**eTable 2.** Associated Diagnoses and Symptoms in Patients Diagnosed With PHP (n = 13,136) Compared to Matched Controls

**eTable 3.** Associated Diagnoses and Symptoms in High-risk Group 1 (Hypercalcemia and PTH  $\geq 50$  pg/mL) (n = 20,176) and High-risk Group 2 (Unexplained Hypercalcemia and No Further Workup) (n = 24,905) Compared to Those Diagnosed (n = 13,136)

**eTable 4.** Lab Values for Patient Cohorts

**eTable 5.** Associated Diagnoses and Symptoms in Patients at High Risk of PHP With Hypercalcemia and PTH  $\geq 40$  (n = 23,969) or 50 pg/mL (n = 20,176) Without a Documented Diagnosis of PHP Compared to Matched Controls

**eTable 6.** Associated Diagnoses and Symptoms in Patients at High Risk of PHP With Hypercalcemia and PTH  $\geq 65$  (n = 14,959) or 100 (n = 7,387) pg/mL Without a Documented Diagnosis of PHP Compared to Matched Controls

**eTable 7.** Comparing Diagnoses and Symptoms in Patients at High Risk of PHP With Hypercalcemia and PTH  $\geq 40$  (n = 23,969) or 50 pg/mL (n = 20,176) Without a Documented Diagnosis With Those Diagnosed (n = 13,136)

**eTable 8.** Comparing Diagnoses and Symptoms in Patients at High Risk of PHP With Hypercalcemia and PTH  $\geq 65$  (n = 14,959) or 100 pg/mL (n = 7,387) Without a Documented Diagnosis With Those Diagnosed (n = 13,136)

**eTable 9.** Comparing Diagnoses and Symptoms in Patients at High Risk of PHP With Hypercalcemia and PTH  $\geq 40$  (n = 23,969) or 50 pg/mL (n = 20,176) Without a Documented Diagnosis With Those Diagnosed With Similar PTH Levels (n = 12,294 for PTH  $\geq 40$  and n = 11,968 for  $\geq 50$  pg/mL)

**eTable 10.** Comparing Diagnoses and Symptoms in Patients at High Risk of PHP With Hypercalcemia and PTH  $\geq 65$  (n = 14,959) or 100 pg/mL (n = 7,387) Without a Documented Diagnosis With Those Diagnosed With Similar PTH Levels (n = 11,262 for PTH  $\geq 65$  and n = 8,192 for  $\geq 100$  pg/mL)

This supplemental material has been provided by the authors to give readers additional information about their work.

**eMethods.** Diagnosis (*ICD-10*) and Procedure (*CPT*) Codes

Diagnosis Codes

D35.1 Benign Neoplasm of Parathyroid Gland  
E21.0 Primary Hyperparathyroidism  
E21.1 Secondary Hyperparathyroidism, Not Elsewhere Classified  
N25.81 Secondary Hyperparathyroidism of Renal Origin  
E21.2 Other Hyperparathyroidism  
E21.4 Other Specified Disorders of Parathyroid Gland  
C75.0 Malignant Neoplasm of Parathyroid Gland  
E31.2 Multiple Endocrine Neoplasia (MEN) Syndromes  
Z94.0 Kidney Transplant Status  
N18.4-6 Chronic kidney disease stage 4, 5, or end stage  
C73 Malignant Neoplasm of Thyroid Gland  
C25 Malignant Neoplasm of Pancreas  
C49 Malignant Neoplasm of Connective and Soft Tissue  
C56 Malignant Neoplasm of Ovary  
C61 Malignant Neoplasm of Prostate  
C81-96 Malignant Neoplasms of Lymphoid, Hematopoietic, and Related Tissue  
C18 Malignant Neoplasm of Colon  
C19 Malignant Neoplasm of Rectosigmoid Junction  
C20 Malignant Neoplasm of Rectum  
C67 Malignant Neoplasm of Bladder  
C50 Malignant Neoplasm of Breast  
C74.1 Malignant Neoplasm of Adrenal Gland  
A15-A19 Tuberculosis  
D86 Sarcoidosis  
E22.0 Acromegaly  
E27.1 Primary Adrenocortical Insufficiency  
M88 Osteitis Deformans  
E05 Thyrotoxicosis (Hyperthyroidism)  
E67.3 Hypervitaminosis D  
E67.0 Hypervitaminosis A  
M80, M81, M85.5, M85.9 Osteoporosis/Osteopenia  
N20-N23 Urolithiasis  
F32, F33 Major Depressive Disorder  
R35 Polyuria  
K59.0 Constipation  
M79.1, M25.5 Myalgias/Joint Pain  
R53.1 Weakness  
R10.1, R10.3, R10.81, R10.84, R10.9 Abdominal pain  
R53.8 Malaise and Fatigue  
F41 Anxiety Disorders  
G47.0 Insomnia  
R41.1, R41.2, R41.3, R41.8, R41.9 Amnesia  
K21 Gastroesophageal Reflux Disease  
I10 Hypertension  
R51 Headache  
S12, S22, S32, S42, S52, S62, S72, S82, S92, M80 Fracture  
R11.0 Nausea  
K80, K81, K82.8 Gallstones

### Procedure Codes

0GBP/0GBN Endocrine System/ Excision/ Inferior Parathyroid Gland, Left/Right  
0GBM/0GBL Endocrine System/ Excision/ Superior Parathyroid Gland, Left/Right  
0GBQ Endocrine System/ Excision/ Parathyroid Glands, Multiple  
0GBR Endocrine System/ Excision Parathyroid Gland  
0GTR Endocrine System/ Resection/ Parathyroid Gland  
0GTM/0GTL Endocrine System/ Resection/ Superior Parathyroid Gland, Left/Right  
0GTQ Endocrine System/ Resection/ Parathyroid Glands, Multiple  
0GTP/0GTN Endocrine System/ Resection/ Inferior Parathyroid Gland, Left/Right  
60500 Parathyroidectomy or Exploration of Parathyroid(s)  
60505 Parathyroidectomy or Exploration of Parathyroid(s); With Mediastinal Exploration, Sternal Split or Transthoracic Approach  
3E0636Z/3E0536Z/3E0336Z/3E0436Z Total Parenteral Nutrition

### Laboratory Codes

8001 Glomerular Filtration Rate in Serum, Plasma, or Blood  
9022 Calcium in Serum, Plasma, or Blood  
38230-9/1994-4 Ionized Calcium in Blood  
9039 Parathyrin in Serum or Plasma  
9045 Albumin in Serum, Plasma, or Blood  
9024 Creatinine in Serum, Plasma, or Blood  
9034 Calcidiol in Serum or Plasma

### Medication Codes

CV701 Thiazides/Related Diuretics  
6448 Lithium  
214342 Calcium Acetate  
1897 Calcium Carbonate  
1921069 Abaloparatide  
32915 Teriparatide  
46041 Alendronate  
77655 Zoledronic Acid  
115264 Ibandronate  
73056 Risedronate  
11473 Pamidronate  
42682 Etidronate  
57230 Tiludronate  
407990 Cinacalcet

**eTable 1:** Associated Diagnoses and Symptoms in Patients in the First (Hypercalcemia and PTH  $\geq 50$  pg/mL Without a Documented Diagnosis) (n = 20,176) and Second (Unexplained Hypercalcemia and No Further Workup) (n = 24,905) High-risk Groups for PHP

|                                        | Diagnosis               | High-Risk PHP PTH $\geq 50$ (n = 17,853 after matching) | High-Risk PHP Unexplained Hypercalcemia (n = 17,853 after matching) | Odds Ratio (95% CI) | <sup>a</sup> P value |
|----------------------------------------|-------------------------|---------------------------------------------------------|---------------------------------------------------------------------|---------------------|----------------------|
| <b>0-1 Year</b>                        | Osteopenia/Osteoporosis | 2,436 (13.6%)                                           | 1,206 (6.8%)                                                        | 2.2 (2.0-2.3)       | <0.001               |
|                                        | Fractures               | 682 (3.8%)                                              | 498 (2.8%)                                                          | 1.4 (1.2-1.6)       | <0.001               |
|                                        | Urolithiasis            | 747 (4.2%)                                              | 491 (2.8%)                                                          | 1.5 (1.4-1.7)       | <0.001               |
|                                        | MDD                     | 1,914 (10.7%)                                           | 1,744 (9.8%)                                                        | 1.1 (1.0-1.2)       | 0.003                |
|                                        | Anxiety Disorders       | 1,826 (10.2%)                                           | 1,684 (9.4%)                                                        | 1.1 (1.0-1.2)       | 0.01                 |
|                                        | HTN                     | 8,497 (47.6%)                                           | 6,430 (36.0%)                                                       | 1.6 (1.5-1.7)       | <0.001               |
|                                        | GERD                    | 2,749 (15.4%)                                           | 2,265 (12.7%)                                                       | 1.3 (1.2-1.3)       | <0.001               |
|                                        | Malaise/Fatigue         | 1,959 (11.0%)                                           | 1,494 (8.4%)                                                        | 1.3 (1.3-1.4)       | <0.001               |
|                                        | Joint Pain/Myalgias     | 5,851 (32.8%)                                           | 4,817 (27.0%)                                                       | 1.3 (1.3-1.4)       | <0.001               |
|                                        | Constipation            | 1,165 (6.5%)                                            | 950 (5.3%)                                                          | 1.2 (1.1-1.4)       | <0.001               |
|                                        | Insomnia                | 837 (4.7%)                                              | 638 (3.6%)                                                          | 1.3 (1.2-1.5)       | <0.001               |
|                                        | Polyuria                | 821 (4.6%)                                              | 651 (3.6%)                                                          | 1.3 (1.1-1.4)       | <0.001               |
|                                        | Weakness                | 1,315 (7.4%)                                            | 1,010 (5.7%)                                                        | 1.3 (1.2-1.4)       | <0.001               |
|                                        | Abdominal Pain          | 2,029 (11.4%)                                           | 2,106 (11.8%)                                                       | 1.0 (0.9-1.0)       | 0.20                 |
|                                        | Headache                | 1,033 (5.8%)                                            | 918 (5.1%)                                                          | 1.1 (1.0-1.2)       | 0.01                 |
|                                        | Nausea                  | 783 (4.4%)                                              | 701 (3.9%)                                                          | 1.1 (1.0-1.2)       | 0.03                 |
| Amnesia                                | 687 (3.8%)              | 747 (4.2%)                                              | 0.9 (0.8-1.0)                                                       | 0.11                |                      |
| Gallstones                             | 357 (2.0%)              | 313 (1.8%)                                              | 1.1 (1.0-1.3)                                                       | 0.09                |                      |
| <b>1-2 Years</b>                       | Osteopenia/Osteoporosis | 2,510 (14.1%)                                           | 1,269 (7.1%)                                                        | 2.1 (2.0-2.3)       | <0.001               |
|                                        | Fractures               | 608 (3.4%)                                              | 421 (2.4%)                                                          | 1.5 (1.3-1.7)       | <0.001               |
|                                        | Urolithiasis            | 629 (3.5%)                                              | 359 (2.0%)                                                          | 1.8 (1.6-2.0)       | <0.001               |
|                                        | MDD                     | 1,832 (10.3%)                                           | 1,463 (8.2%)                                                        | 1.3 (1.2-1.4)       | <0.001               |
|                                        | Anxiety Disorders       | 1,655 (9.3%)                                            | 1,397 (7.8%)                                                        | 1.2 (1.1-1.3)       | <0.001               |
|                                        | HTN                     | 8,331 (46.7%)                                           | 5,688 (31.9%)                                                       | 1.9 (1.8-2.0)       | <0.001               |
|                                        | GERD                    | 2,518 (14.1%)                                           | 1,912 (10.7%)                                                       | 1.4 (1.3-1.5)       | <0.001               |
|                                        | Malaise/Fatigue         | 1,451 (8.1%)                                            | 1,047 (5.9%)                                                        | 1.4 (1.3-1.5)       | <0.001               |
|                                        | Joint Pain/Myalgias     | 3,111 (17.4%)                                           | 2,201 (12.3%)                                                       | 1.5 (1.4-1.6)       | <0.001               |
|                                        | Constipation            | 930 (5.2%)                                              | 677 (3.8%)                                                          | 1.4 (1.3-1.5)       | <0.001               |
|                                        | Insomnia                | 680 (3.8%)                                              | 507 (2.8%)                                                          | 1.4 (1.2-1.5)       | <0.001               |
|                                        | Polyuria                | 742 (4.2%)                                              | 540 (3.0%)                                                          | 1.4 (1.2-1.6)       | <0.001               |
|                                        | Weakness                | 892 (5.0%)                                              | 687 (3.8%)                                                          | 1.3 (1.2-1.5)       | <0.001               |
|                                        | Abdominal Pain          | 1,584 (8.9%)                                            | 1,410 (7.9%)                                                        | 1.1 (1.1-1.2)       | <0.001               |
|                                        | Headache                | 866 (4.9%)                                              | 623 (3.5%)                                                          | 1.4 (1.3-1.6)       | <0.001               |
|                                        | Nausea                  | 555 (3.1%)                                              | 424 (2.4%)                                                          | 1.3 (1.2-1.5)       | <0.001               |
| Amnesia                                | 582 (3.3%)              | 511 (2.9%)                                              | 1.1 (1.0-1.3)                                                       | 0.03                |                      |
| Gallstones                             | 249 (1.4%)              | 183 (1.0%)                                              | 1.4 (1.1-1.7)                                                       | 0.001               |                      |
| <b>2-3 Years</b>                       | Osteopenia/Osteoporosis | 2,699 (15.1%)                                           | 1,386 (7.8%)                                                        | 2.1 (2.0-2.3)       | <0.001               |
|                                        | Fractures               | 636 (3.6%)                                              | 461 (2.6%)                                                          | 1.4 (1.2-1.6)       | <0.001               |
|                                        | Urolithiasis            | 622 (3.5%)                                              | 351 (2.0%)                                                          | 1.8 (1.6-2.1)       | <0.001               |
|                                        | MDD                     | 1,922 (10.8%)                                           | 1,498 (8.4%)                                                        | 1.3 (1.2-1.4)       | <0.001               |
|                                        | Anxiety Disorders       | 1,743 (9.8%)                                            | 1,499 (8.4%)                                                        | 1.2 (1.1-1.3)       | <0.001               |
|                                        | HTN                     | 8,503 (47.6%)                                           | 5,855 (32.8%)                                                       | 1.9 (1.8-1.9)       | <0.001               |
|                                        | GERD                    | 2,621 (14.7%)                                           | 1,991 (11.2%)                                                       | 1.4 (1.3-1.5)       | <0.001               |
|                                        | Malaise/Fatigue         | 1,485 (8.3%)                                            | 1,055 (5.9%)                                                        | 1.4 (1.3-1.6)       | <0.001               |
|                                        | Joint Pain/Myalgias     | 3,067 (17.2%)                                           | 2,341 (13.1%)                                                       | 1.4 (1.3-1.5)       | <0.001               |
|                                        | Constipation            | 947 (5.3%)                                              | 711 (4.0%)                                                          | 1.4 (1.2-1.5)       | <0.001               |
|                                        | Insomnia                | 727 (4.1%)                                              | 537 (3.0%)                                                          | 1.4 (1.2-1.5)       | <0.001               |
|                                        | Polyuria                | 804 (4.5%)                                              | 519 (2.9%)                                                          | 1.6 (1.4-1.8)       | <0.001               |
|                                        | Weakness                | 969 (5.4%)                                              | 662 (3.7%)                                                          | 1.5 (1.3-1.6)       | <0.001               |
|                                        | Abdominal Pain          | 1,611 (9.0%)                                            | 1,457 (8.2%)                                                        | 1.1 (1.0-1.2)       | 0.004                |
|                                        | Headache                | 790 (4.4%)                                              | 626 (3.5%)                                                          | 1.3 (1.1-1.4)       | <0.001               |
|                                        | Nausea                  | 542 (3.0%)                                              | 400 (2.2%)                                                          | 1.4 (1.2-1.6)       | <0.001               |
| Amnesia                                | 621 (3.5%)              | 554 (3.1%)                                              | 1.1 (1.0-1.3)                                                       | 0.05                |                      |
| Gallstones                             | 252 (1.4%)              | 200 (1.1%)                                              | 1.3 (1.0-1.5)                                                       | 0.01                |                      |
| <b>Entire Study Period (0-3 Years)</b> | Osteopenia/Osteoporosis | 4,073 (22.8%)                                           | 2,334 (13.1%)                                                       | 2.0 (1.9-2.1)       | <0.001               |
|                                        | Fractures               | 1,363 (7.6%)                                            | 1,100 (6.2%)                                                        | 1.3 (1.2-1.4)       | <0.001               |
|                                        | Urolithiasis            | 1,218 (6.8%)                                            | 865 (4.8%)                                                          | 1.4 (1.3-1.6)       | <0.001               |
|                                        | MDD                     | 3,063 (17.2%)                                           | 2,684 (15.0%)                                                       | 1.2 (1.1-1.2)       | <0.001               |
|                                        | Anxiety Disorders       | 2,947 (16.5%)                                           | 2,661 (14.9%)                                                       | 1.1 (1.1-1.2)       | <0.001               |
|                                        | HTN                     | 10,434 (58.4%)                                          | 8,224 (46.1%)                                                       | 1.6 (1.6-1.7)       | <0.001               |
|                                        | GERD                    | 4,306 (24.1%)                                           | 3,587 (20.1%)                                                       | 1.3 (1.2-1.3)       | <0.001               |
|                                        | Malaise/Fatigue         | 3,495 (19.6%)                                           | 2,682 (15.0%)                                                       | 1.4 (1.3-1.5)       | <0.001               |
|                                        | Joint Pain/Myalgias     | 5,851 (32.8%)                                           | 4,817 (27.0%)                                                       | 1.3 (1.3-1.4)       | <0.001               |
|                                        | Constipation            | 2,181 (12.2%)                                           | 1,774 (9.9%)                                                        | 1.3 (1.2-1.3)       | <0.001               |

|  |                |               |               |               |        |
|--|----------------|---------------|---------------|---------------|--------|
|  | Insomnia       | 1,499 (8.4%)  | 1,151 (6.4%)  | 1.3 (1.2-1.4) | <0.001 |
|  | Polyuria       | 1,798 (10.1%) | 1,359 (7.6%)  | 1.4 (1.3-1.5) | <0.001 |
|  | Weakness       | 2,387 (13.4%) | 1,897 (10.6%) | 1.3 (1.2-1.4) | <0.001 |
|  | Abdominal Pain | 3,734 (20.9%) | 3,624 (20.3%) | 1.0 (1.0-1.1) | 0.15   |
|  | Headache       | 2,021 (11.3%) | 1,711 (9.6%)  | 1.2 (1.1-1.3) | <0.001 |
|  | Nausea         | 1,433 (8.0%)  | 1,246 (7.0%)  | 1.2 (1.1-1.3) | <0.001 |
|  | Amnesia        | 1,369 (7.7%)  | 1,380 (7.7%)  | 1.0 (0.9-1.1) | 0.83   |
|  | Gallstones     | 671 (3.8%)    | 582 (3.3%)    | 1.2 (1.0-1.3) | 0.01   |

Abbreviations: PHP, primary hyperparathyroidism; PTH, parathyroid hormone; MDD, major depressive disorder; HTN, hypertension; GERD, gastroesophageal reflux disease; CI, confidence interval

<sup>a</sup>Statistical significance defined as  $P < 0.003$

**eTable 2:** Associated Diagnoses and Symptoms in Patients Diagnosed With PHP (n = 13,136) Compared to Matched Controls

|                                        | Diagnosis               | Diagnosed<br>(n = 13,136<br>after matching) | Matched Controls<br>(n = 13,136<br>after matching) | Odds Ratio<br>(95% CI) | <sup>a</sup> P value |
|----------------------------------------|-------------------------|---------------------------------------------|----------------------------------------------------|------------------------|----------------------|
| <b>0-1 Year</b>                        | Osteopenia/Osteoporosis | 2,839 (21.6%)                               | 849 (6.5%)                                         | 4.0 (3.7-4.3)          | <0.001               |
|                                        | Fractures               | 545 (4.1%)                                  | 399 (3.0%)                                         | 1.4 (1.2-1.6)          | <0.001               |
|                                        | Urolithiasis            | 1,172 (8.9%)                                | 201 (1.5%)                                         | 6.3 (5.4-7.3)          | <0.001               |
|                                        | MDD                     | 1,657 (12.6%)                               | 1,104 (8.4%)                                       | 1.6 (1.5-1.7)          | <0.001               |
|                                        | Anxiety Disorders       | 1,410 (10.7%)                               | 1,121 (8.5%)                                       | 1.3 (1.2-1.4)          | <0.001               |
|                                        | HTN                     | 6,869 (52.3%)                               | 4,473 (34.1%)                                      | 2.1 (2.0-2.2)          | <0.001               |
|                                        | GERD                    | 2,415 (18.4%)                               | 1,599 (12.2%)                                      | 1.6 (1.5-1.7)          | <0.001               |
|                                        | Malaise/Fatigue         | 1,778 (13.5%)                               | 1,003 (7.6%)                                       | 1.9 (1.7-2.1)          | <0.001               |
|                                        | Joint Pain/Myalgias     | 2,791 (21.2%)                               | 1,890 (14.4%)                                      | 1.6 (1.5-1.7)          | <0.001               |
|                                        | Constipation            | 1,025 (7.8%)                                | 528 (4.0%)                                         | 2.0 (1.8-2.3)          | <0.001               |
|                                        | Insomnia                | 602 (4.6%)                                  | 391 (3.0%)                                         | 1.6 (1.4-1.8)          | <0.001               |
|                                        | Polyuria                | 791 (6.0%)                                  | 406 (3.1%)                                         | 2.0 (1.8-2.3)          | <0.001               |
|                                        | Weakness                | 1,228 (9.3%)                                | 679 (5.2%)                                         | 1.9 (1.7-2.1)          | <0.001               |
|                                        | Abdominal Pain          | 1,713 (13.0%)                               | 1,190 (9.1%)                                       | 1.5 (1.4-1.6)          | <0.001               |
|                                        | <b>1-2 Years</b>        | Headache                                    | 927 (7.1%)                                         | 609 (4.6%)             | 1.6 (1.4-1.7)        |
| Nausea                                 |                         | 685 (5.2%)                                  | 404 (3.1%)                                         | 1.7 (1.5-2.0)          | <0.001               |
| Amnesia                                |                         | 615 (4.7%)                                  | 356 (2.7%)                                         | 1.8 (1.5-2.0)          | <0.001               |
| Gallstones                             |                         | 307 (2.3%)                                  | 182 (1.4%)                                         | 1.7 (1.4-2.0)          | <0.001               |
| Osteopenia/Osteoporosis                |                         | 2,836 (21.6%)                               | 764 (5.8%)                                         | 4.5 (4.1-4.8)          | <0.001               |
| Fractures                              |                         | 463 (3.5%)                                  | 278 (2.1%)                                         | 1.7 (1.5-2.0)          | <0.001               |
| Urolithiasis                           |                         | 931 (7.1%)                                  | 151 (1.1%)                                         | 6.6 (5.5-7.8)          | <0.001               |
| MDD                                    |                         | 1,522 (11.6%)                               | 863 (6.6%)                                         | 1.9 (1.7-2.0)          | <0.001               |
| Anxiety Disorders                      |                         | 1,277 (9.7%)                                | 891 (6.8%)                                         | 1.5 (1.4-1.6)          | <0.001               |
| HTN                                    |                         | 6,541 (49.8%)                               | 3,625 (27.6%)                                      | 2.6 (2.5-2.7)          | <0.001               |
| GERD                                   |                         | 2,257 (17.2%)                               | 1,210 (9.2%)                                       | 2.0 (1.9-2.2)          | <0.001               |
| Malaise/Fatigue                        |                         | 1,340 (10.2%)                               | 700 (5.3%)                                         | 2.0 (1.8-2.2)          | <0.001               |
| Joint Pain/Myalgias                    |                         | 2,573 (19.6%)                               | 1,609 (12.2%)                                      | 1.7 (1.6-1.9)          | <0.001               |
| Constipation                           |                         | 816 (6.2%)                                  | 330 (2.5%)                                         | 2.6 (2.3-2.9)          | <0.001               |
| <b>2-3 Years</b>                       |                         | Insomnia                                    | 541 (4.1%)                                         | 301 (2.3%)             | 1.8 (1.6-2.1)        |
|                                        | Polyuria                | 660 (5.0%)                                  | 337 (2.6%)                                         | 2.0 (1.8-2.3)          | <0.001               |
|                                        | Weakness                | 902 (6.9%)                                  | 422 (3.2%)                                         | 2.2 (2.0-2.5)          | <0.001               |
|                                        | Abdominal Pain          | 1,438 (10.9%)                               | 755 (5.7%)                                         | 2.0 (1.8-2.2)          | <0.001               |
|                                        | Headache                | 707 (5.4%)                                  | 371 (2.8%)                                         | 2.0 (1.7-2.2)          | <0.001               |
|                                        | Nausea                  | 472 (3.6%)                                  | 243 (1.8%)                                         | 2.0 (1.7-2.3)          | <0.001               |
|                                        | Amnesia                 | 486 (3.7%)                                  | 209 (1.6%)                                         | 2.4 (2.0-2.8)          | <0.001               |
|                                        | Gallstones              | 234 (1.8%)                                  | 98 (0.7%)                                          | 2.4 (1.9-3.1)          | <0.001               |
|                                        | Osteopenia/Osteoporosis | 3,177 (24.2%)                               | 915 (7.0%)                                         | 4.3 (3.9-4.6)          | <0.001               |
|                                        | Fractures               | 496 (3.8%)                                  | 296 (2.3%)                                         | 1.7 (1.5-2.0)          | <0.001               |
|                                        | Urolithiasis            | 956 (7.3%)                                  | 124 (0.9%)                                         | 8.2 (6.8-9.9)          | <0.001               |
|                                        | MDD                     | 1,561 (11.9%)                               | 886 (6.7%)                                         | 1.9 (1.7-2.0)          | <0.001               |
|                                        | Anxiety Disorders       | 1,363 (10.4%)                               | 951 (7.2%)                                         | 1.5 (1.4-1.6)          | <0.001               |
|                                        | HTN                     | 6,634 (50.5%)                               | 3,833 (29.2%)                                      | 2.5 (2.4-2.6)          | <0.001               |
|                                        | GERD                    | 2,310 (17.6%)                               | 1,258 (9.6%)                                       | 2.0 (1.9-2.2)          | <0.001               |
| <b>Entire Study Period (0-3 Years)</b> | Malaise/Fatigue         | 1,384 (10.5%)                               | 720 (5.5%)                                         | 2.0 (1.8-2.2)          | <0.001               |
|                                        | Joint Pain/Myalgias     | 2,619 (19.9%)                               | 1,610 (12.3%)                                      | 1.8 (1.7-1.9)          | <0.001               |
|                                        | Constipation            | 776 (5.9%)                                  | 365 (2.8%)                                         | 2.2 (1.9-2.5)          | <0.001               |
|                                        | Insomnia                | 577 (4.4%)                                  | 344 (2.6%)                                         | 1.7 (1.5-2.0)          | <0.001               |
|                                        | Polyuria                | 666 (5.1%)                                  | 330 (2.5%)                                         | 2.1 (1.8-2.4)          | <0.001               |
|                                        | Weakness                | 846 (6.4%)                                  | 465 (3.5%)                                         | 1.9 (1.7-2.1)          | <0.001               |
|                                        | Abdominal Pain          | 1,374 (10.5%)                               | 778 (5.9%)                                         | 1.9 (1.7-2.0)          | <0.001               |
|                                        | Headache                | 723 (5.5%)                                  | 378 (2.9%)                                         | 2.0 (1.7-2.2)          | <0.001               |
|                                        | Nausea                  | 476 (3.6%)                                  | 231 (1.8%)                                         | 2.1 (1.8-2.5)          | <0.001               |
|                                        | Amnesia                 | 506 (3.9%)                                  | 274 (2.1%)                                         | 1.9 (1.6-2.2)          | <0.001               |
|                                        | Gallstones              | 227 (1.7%)                                  | 113 (0.9%)                                         | 2.0 (1.6-2.5)          | <0.001               |
|                                        | Osteopenia/Osteoporosis | 4,860 (37.0%)                               | 1,606 (12.2%)                                      | 4.2 (4.0-4.5)          | <0.001               |
|                                        | Fractures               | 1,113 (8.5%)                                | 786 (6.0%)                                         | 1.5 (1.3-1.6)          | <0.001               |
|                                        | Urolithiasis            | 1,913 (14.6%)                               | 324 (2.5%)                                         | 6.7 (6.0-7.6)          | <0.001               |
|                                        | MDD                     | 2,677 (20.4%)                               | 1,748 (13.3%)                                      | 1.7 (1.6-1.8)          | <0.001               |
| Anxiety Disorders                      | 2,399 (18.3%)           | 1,803 (13.7%)                               | 1.4 (1.3-1.5)                                      | <0.001                 |                      |
| HTN                                    | 8,577 (65.3%)           | 5,864 (44.6%)                               | 2.3 (2.2-2.5)                                      | <0.001                 |                      |
| GERD                                   | 3,913 (29.8%)           | 2,531 (19.3%)                               | 1.8 (1.7-1.9)                                      | <0.001                 |                      |
| Malaise/Fatigue                        | 3,289 (25.0%)           | 1,868 (14.2%)                               | 2.0 (1.9-2.1)                                      | <0.001                 |                      |
| Joint Pain/Myalgias                    | 5,085 (38.7%)           | 3,543 (27.0%)                               | 1.7 (1.6-1.8)                                      | <0.001                 |                      |
| Constipation                           | 1,923 (14.6%)           | 940 (7.2%)                                  | 2.2 (2.0-2.4)                                      | <0.001                 |                      |
| Insomnia                               | 1,150 (8.8%)            | 728 (5.5%)                                  | 1.6 (1.5-1.8)                                      | <0.001                 |                      |
| Polyuria                               | 1,669 (12.7%)           | 857 (6.5%)                                  | 2.1 (1.9-2.3)                                      | <0.001                 |                      |
| Weakness                               | 2,268 (17.3%)           | 1,267 (9.6%)                                | 2.0 (1.8-2.1)                                      | <0.001                 |                      |

|  |                |               |               |               |        |
|--|----------------|---------------|---------------|---------------|--------|
|  | Abdominal Pain | 3,300 (25.1%) | 2,128 (16.2%) | 1.7 (1.6-1.8) | <0.001 |
|  | Headache       | 1,794 (13.7%) | 1,109 (8.4%)  | 1.7 (1.6-1.9) | <0.001 |
|  | Nausea         | 1,302 (9.9%)  | 739 (5.6%)    | 1.8 (1.7-2.0) | <0.001 |
|  | Amnesia        | 1,159 (8.8%)  | 664 (5.1%)    | 1.8 (1.6-2.0) | <0.001 |
|  | Gallstones     | 580 (4.4%)    | 334 (2.5%)    | 1.8 (1.5-2.0) | <0.001 |

Abbreviations: PHP, primary hyperparathyroidism; PTH, parathyroid hormone; MDD, major depressive disorder; HTN, hypertension; GERD, gastroesophageal reflux disease; CI, confidence interval

<sup>a</sup>Statistical significance defined as  $P < 0.003$

**eTable 3:** Associated Diagnoses and Symptoms in High-risk Group 1 (Hypercalcemia and PTH  $\geq$ 50 pg/mL) (n = 20,176) and High-risk Group 2 (Unexplained Hypercalcemia and No Further Workup) (n = 24,905) Compared to Those Diagnosed (n = 13,136)

|                  | Diagnosis               | High-Risk<br>PHP PTH $\geq$ 50<br>(n = 12,842<br>after matching) | Diagnosed<br>(n = 12,842<br>after matching) | Odds Ratio<br>(95% CI) | <sup>a</sup> P value | High-Risk<br>PHP<br>Unexplained<br>Hypercalcemia<br>(n = 13,136<br>after matching) | Diagnosed<br>(n = 13,136<br>after matching) | Odds Ratio<br>(95% CI) | <sup>a</sup> P value |
|------------------|-------------------------|------------------------------------------------------------------|---------------------------------------------|------------------------|----------------------|------------------------------------------------------------------------------------|---------------------------------------------|------------------------|----------------------|
| <b>0-1 Year</b>  | Osteopenia/Osteoporosis | 1,970 (15.3%)                                                    | 2,797 (21.8%)                               | 0.7 (0.6-0.7)          | <0.001               | 882 (6.7%)                                                                         | 2,839 (21.6%)                               | 0.3 (0.2-0.3)          | <0.001               |
|                  | Fractures               | 551 (4.3%)                                                       | 530 (4.1%)                                  | 1.0 (0.9-1.2)          | 0.51                 | 362 (2.8%)                                                                         | 545 (4.1%)                                  | 0.7 (0.6-0.7)          | <0.001               |
|                  | Urolithiasis            | 620 (4.8%)                                                       | 1,132 (8.8%)                                | 0.5 (0.5-0.6)          | <0.001               | 374 (2.8%)                                                                         | 1,172 (8.9%)                                | 0.3 (0.3-0.3)          | <0.001               |
|                  | MDD                     | 1,585 (12.3%)                                                    | 1,606 (12.5%)                               | 1.0 (0.9-1.1)          | 0.69                 | 1,325 (10.1%)                                                                      | 1,658 (12.6%)                               | 0.8 (0.7-0.8)          | <0.001               |
|                  | Anxiety Disorders       | 1,549 (12.1%)                                                    | 1,359 (10.6%)                               | 1.2 (1.1-1.3)          | <0.001               | 1,344 (10.2%)                                                                      | 1,410 (10.7%)                               | 0.9 (0.9-1.0)          | 0.18                 |
|                  | HTN                     | 6,804 (53.0%)                                                    | 6,761 (52.6%)                               | 1.0 (1.0-1.1)          | 0.59                 | 4,892 (37.2%)                                                                      | 6,871 (52.3%)                               | 0.5 (0.5-0.6)          | <0.001               |
|                  | GERD                    | 2,252 (17.5%)                                                    | 2,364 (18.4%)                               | 0.9 (0.9-1.0)          | 0.07                 | 1,735 (13.2%)                                                                      | 2,416 (18.4%)                               | 0.7 (0.6-0.7)          | <0.001               |
|                  | Malaise/Fatigue         | 1,593 (12.4%)                                                    | 1,735 (13.5%)                               | 0.9 (0.8-1.0)          | 0.008                | 1,162 (8.8%)                                                                       | 1,778 (13.5%)                               | 0.6 (0.6-0.7)          | <0.001               |
|                  | Joint Pain/Myalgias     | 2,631 (20.5%)                                                    | 2,725 (21.2%)                               | 1.0 (0.9-1.0)          | 0.15                 | 2,057 (15.7%)                                                                      | 2,791 (21.2%)                               | 0.7 (0.6-0.7)          | <0.001               |
|                  | Constipation            | 950 (7.4%)                                                       | 1,005 (7.8%)                                | 0.9 (0.9-1.0)          | 0.20                 | 726 (5.5%)                                                                         | 1,026 (7.8%)                                | 0.7 (0.6-0.8)          | <0.001               |
|                  | Insomnia                | 699 (5.4%)                                                       | 583 (4.5%)                                  | 1.2 (1.1-1.4)          | <0.001               | 499 (3.8%)                                                                         | 602 (4.6%)                                  | 0.8 (0.7-0.9)          | 0.002                |
|                  | Polyuria                | 639 (5.0%)                                                       | 773 (6.0%)                                  | 0.8 (0.7-0.9)          | <0.001               | 486 (3.7%)                                                                         | 791 (6.0%)                                  | 0.6 (0.5-0.7)          | <0.001               |
|                  | Weakness                | 1,068 (8.3%)                                                     | 1,195 (9.3%)                                | 0.9 (0.8-1.0)          | 0.005                | 794 (6.0%)                                                                         | 1,228 (9.3%)                                | 0.6 (0.6-0.7)          | <0.001               |
|                  | Abdominal Pain          | 1,683 (13.1%)                                                    | 1,661 (12.9%)                               | 1.0 (0.9-1.1)          | 0.68                 | 1,603 (12.2%)                                                                      | 1,713 (13.0%)                               | 0.9 (0.9-1.0)          | 0.04                 |
|                  | Headache                | 856 (6.7%)                                                       | 897 (7.0%)                                  | 1.0 (0.9-1.0)          | 0.31                 | 714 (5.4%)                                                                         | 927 (7.1%)                                  | 0.8 (0.7-0.8)          | <0.001               |
|                  | Nausea                  | 672 (5.2%)                                                       | 660 (5.1%)                                  | 1.0 (0.9-1.1)          | 0.74                 | 547 (4.2%)                                                                         | 685 (5.2%)                                  | 0.8 (0.7-0.9)          | <0.001               |
| Amnesia          | 557 (4.3%)              | 609 (4.7%)                                                       | 0.9 (0.8-1.0)                               | 0.12                   | 512 (3.9%)           | 615 (4.7%)                                                                         | 0.8 (0.7-0.9)                               | 0.002                  |                      |
| Gallstones       | 293 (2.3%)              | 301 (2.3%)                                                       | 1.0 (0.8-1.1)                               | 0.74                   | 255 (1.9%)           | 307 (2.3%)                                                                         | 0.8 (0.7-1.0)                               | 0.03                   |                      |
| <b>1-2 Years</b> | Osteopenia/Osteoporosis | 2,059 (16.0%)                                                    | 2,795 (21.8%)                               | 0.7 (0.6-0.7)          | <0.001               | 927 (7.1%)                                                                         | 2,836 (21.6%)                               | 0.3 (0.3-0.3)          | <0.001               |
|                  | Fractures               | 479 (3.7%)                                                       | 453 (3.5%)                                  | 1.1 (0.9-1.2)          | 0.39                 | 305 (2.3%)                                                                         | 463 (3.5%)                                  | 0.7 (0.6-0.8)          | <0.001               |
|                  | Urolithiasis            | 518 (4.0%)                                                       | 903 (7.0%)                                  | 0.6 (0.5-0.6)          | <0.001               | 283 (2.2%)                                                                         | 931 (7.1%)                                  | 0.3 (0.3-0.3)          | <0.001               |
|                  | MDD                     | 1,511 (11.8%)                                                    | 1,476 (11.5%)                               | 1.0 (1.0-1.1)          | 0.50                 | 1,120 (8.5%)                                                                       | 1,522 (11.6%)                               | 0.7 (0.7-0.8)          | <0.001               |
|                  | Anxiety Disorders       | 1,390 (10.8%)                                                    | 1,236 (9.6%)                                | 1.1 (1.1-1.2)          | 0.002                | 1,122 (8.5%)                                                                       | 1,277 (9.7%)                                | 0.9 (0.8-0.9)          | <0.001               |
|                  | HTN                     | 6,679 (52.0%)                                                    | 6,446 (50.2%)                               | 1.1 (1.0-1.1)          | 0.004                | 4,345 (33.1%)                                                                      | 6,541 (49.8%)                               | 0.5 (0.5-0.5)          | <0.001               |
|                  | GERD                    | 2,058 (16.0%)                                                    | 2,211 (17.2%)                               | 0.9 (0.9-1.0)          | 0.01                 | 1,493 (11.4%)                                                                      | 2,257 (17.2%)                               | 0.6 (0.6-0.7)          | <0.001               |
|                  | Malaise/Fatigue         | 1,206 (9.4%)                                                     | 1,306 (10.2%)                               | 0.9 (0.8-1.0)          | 0.04                 | 813 (6.2%)                                                                         | 1,340 (10.2%)                               | 0.6 (0.5-0.6)          | <0.001               |
|                  | Joint Pain/Myalgias     | 2,548 (19.8%)                                                    | 2,506 (19.5%)                               | 1.0 (1.0-1.1)          | 0.51                 | 1,759 (13.4%)                                                                      | 2,573 (19.6%)                               | 0.6 (0.6-0.7)          | <0.001               |
|                  | Constipation            | 747 (5.8%)                                                       | 799 (6.2%)                                  | 0.9 (0.8-1.0)          | 0.17                 | 481 (3.7%)                                                                         | 816 (6.2%)                                  | 0.6 (0.5-0.6)          | <0.001               |
|                  | Insomnia                | 558 (4.3%)                                                       | 527 (4.1%)                                  | 1.1 (0.9-1.2)          | 0.34                 | 381 (2.9%)                                                                         | 541 (4.1%)                                  | 0.7 (0.6-0.8)          | <0.001               |
|                  | Polyuria                | 593 (4.6%)                                                       | 643 (5.0%)                                  | 0.9 (0.8-1.0)          | 0.14                 | 374 (2.8%)                                                                         | 660 (5.0%)                                  | 0.6 (0.5-0.6)          | <0.001               |
|                  | Weakness                | 732 (5.7%)                                                       | 880 (6.9%)                                  | 0.8 (0.7-0.9)          | <0.001               | 526 (4.0%)                                                                         | 902 (6.9%)                                  | 0.6 (0.5-0.6)          | <0.001               |
|                  | Abdominal Pain          | 1,290 (10.0%)                                                    | 1,394 (10.9%)                               | 0.9 (0.8-1.0)          | 0.03                 | 1,060 (8.1%)                                                                       | 1,438 (10.9%)                               | 0.7 (0.7-0.8)          | <0.001               |
|                  | Headache                | 718 (5.6%)                                                       | 676 (5.3%)                                  | 1.1 (1.0-1.2)          | 0.25                 | 484 (3.7%)                                                                         | 707 (5.4%)                                  | 0.7 (0.6-0.8)          | <0.001               |
|                  | Nausea                  | 467 (3.6%)                                                       | 458 (3.6%)                                  | 1.0 (0.9-1.2)          | 0.76                 | 342 (2.6%)                                                                         | 472 (3.6%)                                  | 0.7 (0.6-0.8)          | <0.001               |
| Amnesia          | 458 (3.6%)              | 476 (3.7%)                                                       | 1.0 (0.8-1.1)                               | 0.55                   | 346 (2.6%)           | 486 (3.7%)                                                                         | 0.7 (0.6-0.8)                               | <0.001                 |                      |
| Gallstones       | 201 (1.6%)              | 229 (1.8%)                                                       | 0.9 (0.7-1.1)                               | 0.17                   | 146 (1.1%)           | 234 (1.8%)                                                                         | 0.6 (0.5-0.8)                               | <0.001                 |                      |
| <b>2-3 Years</b> | Osteopenia/Osteoporosis | 2,198 (17.1%)                                                    | 3,132 (24.4%)                               | 0.6 (0.6-0.7)          | <0.001               | 1,047 (8.0%)                                                                       | 3,177 (24.2%)                               | 0.3 (0.3-0.3)          | <0.001               |
|                  | Fractures               | 506 (3.9%)                                                       | 485 (3.8%)                                  | 1.0 (0.9-1.2)          | 0.50                 | 356 (2.7%)                                                                         | 496 (3.8%)                                  | 0.7 (0.6-0.8)          | <0.001               |
|                  | Urolithiasis            | 525 (4.1%)                                                       | 923 (7.2%)                                  | 0.6 (0.5-0.6)          | <0.001               | 282 (2.1%)                                                                         | 956 (7.3%)                                  | 0.3 (0.2-0.3)          | <0.001               |
|                  | MDD                     | 1,583 (12.3%)                                                    | 1,509 (11.8%)                               | 1.1 (1.0-1.1)          | 0.16                 | 1,132 (8.6%)                                                                       | 1,561 (11.9%)                               | 0.7 (0.6-0.8)          | <0.001               |
|                  | Anxiety Disorders       | 1,462 (11.4%)                                                    | 1,314 (10.2%)                               | 1.1 (1.0-1.2)          | 0.003                | 1,183 (9.0%)                                                                       | 1,363 (10.4%)                               | 0.9 (0.8-0.9)          | <0.001               |
|                  | HTN                     | 6,796 (52.9%)                                                    | 6,538 (50.9%)                               | 1.1 (1.0-1.1)          | 0.001                | 4,496 (34.2%)                                                                      | 6,634 (50.5%)                               | 0.5 (0.5-0.5)          | <0.001               |
|                  | GERD                    | 2,135 (16.6%)                                                    | 2,250 (17.5%)                               | 0.9 (0.9-1.0)          | 0.06                 | 1,553 (11.8%)                                                                      | 2,310 (17.6%)                               | 0.6 (0.6-0.7)          | <0.001               |
|                  | Malaise/Fatigue         | 1,234 (9.6%)                                                     | 1,356 (10.6%)                               | 0.9 (0.8-1.0)          | 0.01                 | 833 (6.3%)                                                                         | 1,384 (10.5%)                               | 0.6 (0.5-0.6)          | <0.001               |
|                  | Joint Pain/Myalgias     | 2,508 (19.5%)                                                    | 2,560 (19.9%)                               | 1.0 (0.9-1.0)          | 0.41                 | 1,824 (13.9%)                                                                      | 2,619 (19.9%)                               | 0.6 (0.6-0.7)          | <0.001               |
|                  | Constipation            | 775 (6.0%)                                                       | 762 (5.9%)                                  | 1.0 (0.9-1.1)          | 0.73                 | 546 (4.2%)                                                                         | 776 (5.9%)                                  | 0.7 (0.6-0.8)          | <0.001               |



|                                        |                         |               |               |               |        |               |               |               |        |
|----------------------------------------|-------------------------|---------------|---------------|---------------|--------|---------------|---------------|---------------|--------|
| <b>Entire Study Period (0-3 Years)</b> | Insomnia                | 598 (4.7%)    | 558 (4.3%)    | 1.1 (1.0-1.2) | 0.23   | 381 (2.9%)    | 577 (4.4%)    | 0.7 (0.6-0.7) | <0.001 |
|                                        | Polyuria                | 628 (4.9%)    | 656 (5.1%)    | 1.0 (0.9-1.1) | 0.42   | 383 (2.9%)    | 666 (5.1%)    | 0.6 (0.5-0.6) | <0.001 |
|                                        | Weakness                | 802 (6.2%)    | 828 (6.4%)    | 1.0 (0.9-1.1) | 0.51   | 519 (4.0%)    | 846 (6.4%)    | 0.6 (0.5-0.7) | <0.001 |
|                                        | Abdominal Pain          | 1,333 (10.4%) | 1,334 (10.4%) | 1.0 (0.9-1.1) | 0.98   | 1,126 (8.6%)  | 1,374 (10.5%) | 0.8 (0.7-0.9) | <0.001 |
|                                        | Headache                | 666 (5.2%)    | 698 (5.4%)    | 1.0 (0.9-1.1) | 0.37   | 484 (3.7%)    | 723 (5.5%)    | 0.7 (0.6-0.7) | <0.001 |
|                                        | Nausea                  | 467 (3.6%)    | 462 (3.6%)    | 1.0 (0.9-1.2) | 0.87   | 332 (2.5%)    | 476 (3.6%)    | 0.7 (0.6-0.8) | <0.001 |
|                                        | Amnesia                 | 488 (3.8%)    | 498 (3.9%)    | 1.0 (0.9-1.1) | 0.75   | 408 (3.1%)    | 506 (3.9%)    | 0.8 (0.7-0.9) | <0.001 |
|                                        | Gallstones              | 211 (1.6%)    | 224 (1.7%)    | 0.9 (0.8-1.1) | 0.53   | 158 (1.2%)    | 227 (1.7%)    | 0.7 (0.6-0.8) | <0.001 |
|                                        | Osteopenia/Osteoporosis | 3,326 (25.9%) | 4,787 (37.3%) | 0.6 (0.6-0.6) | <0.001 | 1,746 (13.3%) | 4,860 (37.0%) | 0.3 (0.2-0.3) | <0.001 |
|                                        | Fractures               | 1,091 (8.5%)  | 1,089 (8.5%)  | 1.0 (0.9-1.1) | 0.96   | 813 (6.2%)    | 1,113 (8.5%)  | 0.7 (0.6-0.8) | <0.001 |
|                                        | Urolithiasis            | 1,010 (7.9%)  | 1,847 (14.4%) | 0.5 (0.5-0.6) | <0.001 | 676 (5.1%)    | 1,913 (14.6%) | 0.3 (0.3-0.3) | <0.001 |
|                                        | MDD                     | 2,528 (19.7%) | 2,599 (20.2%) | 1.0 (0.9-1.0) | 0.27   | 2,060 (15.7%) | 2,678 (20.4%) | 0.7 (0.7-0.8) | <0.001 |
|                                        | Anxiety Disorders       | 2,485 (19.4%) | 2,320 (18.1%) | 1.1 (1.0-1.2) | 0.008  | 2,108 (16.0%) | 2,399 (18.3%) | 0.9 (0.8-0.9) | <0.001 |
|                                        | HTN                     | 8,371 (65.2%) | 8,425 (65.6%) | 1.0 (0.9-1.0) | 0.48   | 6,261 (47.7%) | 8,579 (65.3%) | 0.5 (0.5-0.5) | <0.001 |
|                                        | GERD                    | 3,515 (27.4%) | 3,823 (29.8%) | 0.9 (0.8-0.9) | <0.001 | 2,751 (20.9%) | 3,914 (29.8%) | 0.6 (0.6-0.7) | <0.001 |
|                                        | Malaise/Fatigue         | 2,859 (22.3%) | 3,208 (25.0%) | 0.9 (0.8-0.9) | <0.001 | 2,112 (16.1%) | 3,289 (25.0%) | 0.6 (0.5-0.6) | <0.001 |
|                                        | Joint Pain/Myalgias     | 4,771 (37.2%) | 4,966 (38.7%) | 0.9 (0.9-1.0) | 0.01   | 3,783 (28.8%) | 5,085 (38.7%) | 0.6 (0.6-0.7) | <0.001 |
|                                        | Constipation            | 1,779 (13.9%) | 1,887 (14.7%) | 0.9 (0.9-1.0) | 0.05   | 1,345 (10.2%) | 1,924 (14.6%) | 0.7 (0.6-0.7) | <0.001 |
|                                        | Insomnia                | 1,236 (9.6%)  | 1,116 (8.7%)  | 1.1 (1.0-1.2) | 0.009  | 852 (6.5%)    | 1,150 (8.8%)  | 0.7 (0.7-0.8) | <0.001 |
|                                        | Polyuria                | 1,432 (11.2%) | 1,634 (12.7%) | 0.9 (0.8-0.9) | <0.001 | 1,009 (7.7%)  | 1,669 (12.7%) | 0.6 (0.5-0.6) | <0.001 |
|                                        | Weakness                | 1,954 (15.2%) | 2,212 (17.2%) | 0.9 (0.8-0.9) | <0.001 | 1,482 (11.3%) | 2,268 (17.3%) | 0.6 (0.6-0.7) | <0.001 |
|                                        | Abdominal Pain          | 3,075 (23.9%) | 3,203 (24.9%) | 0.9 (0.9-1.0) | 0.07   | 2,801 (21.3%) | 3,300 (25.1%) | 0.8 (0.8-0.9) | <0.001 |
|                                        | Headache                | 1,685 (13.1%) | 1,737 (13.5%) | 1.0 (0.9-1.0) | 0.34   | 1,343 (10.2%) | 1,794 (13.7%) | 0.7 (0.7-0.8) | <0.001 |
|                                        | Nausea                  | 1,214 (9.5%)  | 1,262 (9.8%)  | 1.0 (0.9-1.0) | 0.31   | 981 (7.5%)    | 1,302 (9.9%)  | 0.7 (0.7-0.8) | <0.001 |
|                                        | Amnesia                 | 1,104 (8.6%)  | 1,140 (8.9%)  | 1.0 (0.9-1.1) | 0.43   | 965 (7.3%)    | 1,159 (8.8%)  | 0.8 (0.7-0.9) | <0.001 |
|                                        | Gallstones              | 550 (4.3%)    | 571 (4.4%)    | 1.0 (0.9-1.1) | 0.52   | 474 (3.6%)    | 580 (4.4%)    | 0.8 (0.7-0.9) | <0.001 |

Abbreviations: PHP, primary hyperparathyroidism; PTH, parathyroid hormone; MDD, major depressive disorder; HTN, hypertension; GERD, gastroesophageal reflux disease; CI, confidence interval

<sup>a</sup>Statistical significance defined as  $P < 0.003$

**eTable 4:** Lab Values for Patient Cohorts

| Patient Cohort                                               | Mean Calcium +/- SD (mg/dL) | Mean PTH +/- SD (pg/mL) | Mean Albumin +/- SD (g/dL) | <sup>a</sup> Corrected Calcium (mg/dL) |
|--------------------------------------------------------------|-----------------------------|-------------------------|----------------------------|----------------------------------------|
| High Risk PHP PTH ≥40 (n = 23,969)                           | 10.8 +/- 0.5                | 84 +/- 67               | 4.2 +/- 0.4                | 10.6                                   |
| High Risk PHP PTH ≥50 (n = 20,176)                           | 10.8 +/- 0.5                | 93 +/- 70               | 4.2 +/- 0.4                | 10.6                                   |
| High Risk PHP PTH ≥65 (n = 14,959)                           | 10.8 +/- 0.5                | 108 +/- 77              | 4.2 +/- 0.4                | 10.6                                   |
| High Risk PHP PTH ≥100 (n = 7,387)                           | 10.9 +/- 0.6                | 148 +/- 100             | 4.1 +/- 0.4                | 10.8                                   |
| Unexplained hypercalcemia and no further workup (n = 24,905) | 10.7 +/- 0.5                | -                       | 4.2 +/- 0.5                | 10.5                                   |
| All PHP Diagnosed (n = 13,136)                               | 10.9 +/- 0.5                | 107 +/- 101             | 4.2 +/- 0.6                | 10.7                                   |
| PHP Diagnosed PTH ≥40 (n = 12,294)                           | 10.9 +/- 0.5                | 115 +/- 100             | 4.2 +/- 0.6                | 10.7                                   |
| PHP Diagnosed PTH ≥50 (n = 11,968)                           | 10.9 +/- 0.5                | 118 +/- 100             | 4.2 +/- 0.6                | 10.7                                   |
| PHP Diagnosed PTH ≥65 (n = 11,262)                           | 10.9 +/- 0.5                | 125 +/- 103             | 4.2 +/- 0.6                | 10.7                                   |
| PHP Diagnosed PTH ≥100 (n = 8,192)                           | 10.9 +/- 0.6                | 152 +/- 116             | 4.2 +/- 0.6                | 10.7                                   |
| Hypercalcemia to Diagnosis ≤ 1 Year (n = 3,686)              | 11.1 +/- 0.7                | 121 +/- 112             | 4.2 +/- 0.6                | 10.9                                   |
| Hypercalcemia to Diagnosis > 1 Year (n = 9,450)              | 10.8 +/- 0.4                | 102 +/- 96              | 4.2 +/- 0.6                | 10.6                                   |
| Diagnosis to Surgery ≤ 1 Year (n = 3,134)                    | 11.0 +/- 0.6                | 135 +/- 154             | 4.3 +/- 0.6                | 10.8                                   |
| Diagnosis to Surgery > 1 Year (n = 748)                      | 10.9 +/- 0.4                | 112 +/- 72              | 4.2 +/- 0.6                | 10.7                                   |

<sup>a</sup>Corrected calcium = serum calcium + 0.8 (4 – serum albumin)

Abbreviations: PHP, primary hyperparathyroidism; PTH, parathyroid hormone; SD, standard deviation

**eTable 5:** Associated Diagnoses and Symptoms in Patients at High Risk of PHP With Hypercalcemia and PTH  $\geq 40$  (n = 23,969) or 50 pg/mL (n = 20,176) Without a Documented Diagnosis of PHP Compared to Matched Controls

|                  | Diagnosis               | High-Risk PHP PTH $\geq 40$<br>(n = 23,968<br>after matching) | Matched Controls<br>(n = 23,968<br>after matching) | Odds Ratio<br>(95% CI) | <sup>a</sup> P value | High-Risk PHP PTH $\geq 50$<br>(n = 20,175<br>after matching) | Matched Controls<br>(n = 20,175<br>after matching) | Odds Ratio<br>(95% CI) | <sup>a</sup> P value |
|------------------|-------------------------|---------------------------------------------------------------|----------------------------------------------------|------------------------|----------------------|---------------------------------------------------------------|----------------------------------------------------|------------------------|----------------------|
| <b>0-1 Year</b>  | Osteopenia/Osteoporosis | 3,291 (13.7%)                                                 | 1,439 (6.0%)                                       | 2.5 (2.3-2.7)          | < 0.001              | 2,662 (13.2%)                                                 | 1,099 (5.4%)                                       | 2.6 (2.5-2.8)          | < 0.001              |
|                  | Fractures               | 904 (3.8%)                                                    | 619 (2.6%)                                         | 1.5 (1.3-1.4)          | < 0.001              | 719 (3.6%)                                                    | 478 (2.4%)                                         | 1.5 (1.4-1.7)          | < 0.001              |
|                  | Urolithiasis            | 977 (4.1%)                                                    | 343 (1.4%)                                         | 2.9 (2.6-3.3)          | < 0.001              | 771 (3.8%)                                                    | 281 (1.4%)                                         | 2.8 (2.5-3.2)          | < 0.001              |
|                  | MDD                     | 2,478 (10.3%)                                                 | 1,677 (7.0%)                                       | 1.5 (1.4-1.6)          | < 0.001              | 2,009 (10.0%)                                                 | 1,393 (6.9%)                                       | 1.5 (1.4-1.6)          | < 0.001              |
|                  | Anxiety Disorders       | 2,368 (9.9%)                                                  | 1,632 (6.8%)                                       | 1.5 (1.4-1.6)          | < 0.001              | 1,920 (9.5%)                                                  | 1,347 (6.7%)                                       | 1.5 (1.4-1.6)          | < 0.001              |
|                  | HTN                     | 11,179 (46.6%)                                                | 7,494 (31.3%)                                      | 1.9 (1.9-2.0)          | < 0.001              | 9,107 (45.1%)                                                 | 6,231 (30.9%)                                      | 1.8 (1.8-1.9)          | < 0.001              |
|                  | GERD                    | 3,610 (15.1%)                                                 | 2,591 (10.8%)                                      | 1.5 (1.4-1.5)          | < 0.001              | 2,952 (14.6%)                                                 | 2,047 (10.1%)                                      | 1.5 (1.4-1.6)          | < 0.001              |
|                  | Malaise/Fatigue         | 2,547 (10.6%)                                                 | 1,640 (6.8%)                                       | 1.6 (1.5-1.7)          | < 0.001              | 2,065 (10.2%)                                                 | 1,328 (6.6%)                                       | 1.6 (1.5-1.3)          | < 0.001              |
|                  | Joint Pain/ Myalgias    | 4,326 (18.0%)                                                 | 2,947 (12.3%)                                      | 1.6 (1.5-1.7)          | < 0.001              | 3,461 (17.2%)                                                 | 2,385 (11.8%)                                      | 1.5 (1.5-1.6)          | < 0.001              |
|                  | Constipation            | 1,533 (6.4%)                                                  | 847 (3.5%)                                         | 1.9 (1.7-2.0)          | < 0.001              | 1,247 (6.2%)                                                  | 719 (3.6%)                                         | 1.8 (1.6-2.0)          | < 0.001              |
|                  | Insomnia                | 1,114 (4.6%)                                                  | 672 (2.8%)                                         | 1.7 (1.5-1.9)          | < 0.001              | 885 (4.4%)                                                    | 524 (2.6%)                                         | 1.7 (1.5-1.9)          | < 0.001              |
|                  | Polyuria                | 1,099 (4.6%)                                                  | 619 (2.6%)                                         | 1.8 (1.6-2.0)          | < 0.001              | 874 (4.3%)                                                    | 506 (2.5%)                                         | 1.8 (1.6-2.0)          | < 0.001              |
|                  | Weakness                | 1,719 (7.2%)                                                  | 1,118 (4.7%)                                       | 1.6 (1.5-1.7)          | < 0.001              | 1,374 (6.8%)                                                  | 872 (4.3%)                                         | 1.6 (1.5-1.8)          | < 0.001              |
|                  | Abdominal Pain          | 2,658 (11.1%)                                                 | 1,950 (8.1%)                                       | 1.4 (1.3-1.5)          | < 0.001              | 2,142 (10.6%)                                                 | 1,573 (7.8%)                                       | 1.4 (1.3-1.5)          | < 0.001              |
| Headache         | 1,407 (5.9%)            | 966 (4.0%)                                                    | 1.5 (1.4-1.6)                                      | < 0.001                | 1,104 (5.5%)         | 794 (3.9%)                                                    | 1.4 (1.3-1.6)                                      | < 0.001                |                      |
| Nausea           | 1,049 (4.4%)            | 611 (2.5%)                                                    | 1.8 (1.6-1.9)                                      | < 0.001                | 814 (4.0%)           | 498 (2.5%)                                                    | 1.7 (1.5-1.9)                                      | < 0.001                |                      |
| Amnesia          | 910 (3.8%)              | 585 (2.4%)                                                    | 1.6 (1.4-1.8)                                      | < 0.001                | 738 (3.7%)           | 506 (2.5%)                                                    | 1.5 (1.3-1.7)                                      | < 0.001                |                      |
| Gallstones       | 462 (1.9%)              | 320 (1.3%)                                                    | 1.5 (1.3-1.7)                                      | < 0.001                | 373 (1.8%)           | 217 (1.1%)                                                    | 1.7 (1.5-2.1)                                      | < 0.001                |                      |
| <b>1-2 Years</b> | Osteopenia/Osteoporosis | 3,387 (14.1%)                                                 | 1,365 (5.7%)                                       | 2.7 (2.6-2.9)          | < 0.001              | 2,718 (13.5%)                                                 | 1,070 (5.3%)                                       | 2.8 (2.6-3.0)          | < 0.001              |
|                  | Fractures               | 844 (3.5%)                                                    | 446 (1.9%)                                         | 1.9 (1.7-2.2)          | < 0.001              | 647 (3.2%)                                                    | 367 (1.8%)                                         | 1.8 (1.6-2.0)          | < 0.001              |
|                  | Urolithiasis            | 827 (3.5%)                                                    | 220 (0.9%)                                         | 3.9 (3.3-4.5)          | < 0.001              | 651 (3.2%)                                                    | 198 (1.0%)                                         | 3.4 (2.9-3.9)          | < 0.001              |
|                  | MDD                     | 2,329 (9.7%)                                                  | 1,395 (5.8%)                                       | 1.7 (1.6-1.9)          | < 0.001              | 1,909 (9.5%)                                                  | 1,164 (5.8%)                                       | 1.7 (1.6-1.8)          | < 0.001              |
|                  | Anxiety Disorders       | 2,164 (9.0%)                                                  | 1,249 (5.2%)                                       | 1.8 (1.7-1.9)          | < 0.001              | 1,740 (8.6%)                                                  | 1,105 (5.5%)                                       | 1.6 (1.5-1.8)          | < 0.001              |
|                  | HTN                     | 10,967 (45.8%)                                                | 6,132 (25.6%)                                      | 2.5 (2.4-2.6)          | < 0.001              | 8,940 (44.3%)                                                 | 5,057 (25.1%)                                      | 2.4 (2.3-2.5)          | < 0.001              |
|                  | GERD                    | 3,331 (13.9%)                                                 | 1,991 (8.3%)                                       | 1.8 (1.7-1.9)          | < 0.001              | 2,690 (13.3%)                                                 | 1,606 (8.0%)                                       | 1.8 (1.7-1.9)          | < 0.001              |
|                  | Malaise/Fatigue         | 1,912 (8.0%)                                                  | 1,118 (4.7%)                                       | 1.8 (1.6-1.9)          | < 0.001              | 1,531 (7.6%)                                                  | 898 (4.5%)                                         | 1.8 (1.6-1.9)          | < 0.001              |
|                  | Joint Pain/Myalgias     | 4,113 (17.2%)                                                 | 2,502 (10.4%)                                      | 1.8 (1.7-1.9)          | < 0.001              | 3,327 (16.5%)                                                 | 2,004 (9.9%)                                       | 1.8 (1.7-1.9)          | < 0.001              |
|                  | Constipation            | 1,238 (5.2%)                                                  | 584 (2.4%)                                         | 2.2 (2.0-2.4)          | < 0.001              | 1,001 (5.0%)                                                  | 472 (2.3%)                                         | 2.2 (2.0-2.4)          | < 0.001              |
|                  | Insomnia                | 917 (3.8%)                                                    | 508 (2.1%)                                         | 1.8 (1.6-2.1)          | < 0.001              | 725 (3.6%)                                                    | 395 (2.0%)                                         | 1.9 (1.6-2.1)          | < 0.001              |
|                  | Polyuria                | 968 (4.0%)                                                    | 547 (2.3%)                                         | 1.8 (1.6-2.0)          | < 0.001              | 786 (3.9%)                                                    | 420 (2.1%)                                         | 1.9 (1.7-2.2)          | < 0.001              |
|                  | Weakness                | 1,204 (5.0%)                                                  | 703 (2.9%)                                         | 1.6 (1.6-1.9)          | < 0.001              | 948 (4.7%)                                                    | 547 (2.8%)                                         | 1.8 (1.6-2.0)          | < 0.001              |
|                  | Abdominal Pain          | 2,114 (8.8%)                                                  | 1,225 (5.1%)                                       | 1.8 (1.7-1.9)          | < 0.001              | 1,698 (8.4%)                                                  | 949 (4.7%)                                         | 1.9 (1.7-2.0)          | < 0.001              |
|                  | Headache                | 1,183 (4.9%)                                                  | 645 (2.7%)                                         | 1.9 (1.7-2.1)          | < 0.001              | 923 (4.6%)                                                    | 505 (2.5%)                                         | 1.9 (1.7-2.1)          | < 0.001              |
|                  | Nausea                  | 765 (3.2%)                                                    | 372 (1.6%)                                         | 2.1 (1.8-2.4)          | < 0.001              | 598 (3.0%)                                                    | 292 (1.4%)                                         | 2.1 (1.8-2.4)          | < 0.001              |
|                  | Amnesia                 | 785 (3.3%)                                                    | 436 (1.8%)                                         | 1.8 (1.6-2.1)          | < 0.001              | 635 (3.1%)                                                    | 373 (1.8%)                                         | 1.7 (1.5-2.0)          | < 0.001              |
| Gallstones       | 323 (1.3%)              | 157 (0.7%)                                                    | 2.1 (1.7-2.5)                                      | < 0.001                | 265 (1.3%)           | 124 (0.6%)                                                    | 2.2 (1.7-2.7)                                      | < 0.001                |                      |
| <b>2-3 Years</b> | Osteopenia/Osteoporosis | 3,631 (15.1%)                                                 | 1,510 (6.3%)                                       | 2.7 (2.5-2.8)          | < 0.001              | 2,945 (14.6%)                                                 | 1,254 (6.2%)                                       | 2.6 (2.4-2.8)          | < 0.001              |
|                  | Fractures               | 878 (3.7%)                                                    | 499 (2.1%)                                         | 1.8 (1.6-2.0)          | < 0.001              | 679 (3.4%)                                                    | 418 (2.1%)                                         | 1.6 (1.5-1.9)          | < 0.001              |
|                  | Urolithiasis            | 834 (3.5%)                                                    | 212 (0.9%)                                         | 4.0 (3.5-4.7)          | < 0.001              | 644 (3.2%)                                                    | 175 (0.9%)                                         | 3.8 (3.2-4.5)          | < 0.001              |
|                  | MDD                     | 2,482 (10.4%)                                                 | 1,461 (6.1%)                                       | 1.8 (1.7-1.9)          | < 0.001              | 2,024 (10.0%)                                                 | 1,200 (5.9%)                                       | 1.8 (1.6-1.9)          | < 0.001              |
|                  | Anxiety Disorders       | 2,253 (9.4%)                                                  | 1,419 (5.9%)                                       | 1.6 (1.5-1.8)          | < 0.001              | 1,835 (9.1%)                                                  | 1,163 (5.8%)                                       | 1.6 (1.5-1.8)          | < 0.001              |
|                  | HTN                     | 11,167 (46.6%)                                                | 6,417 (26.8%)                                      | 2.4 (2.3-2.5)          | < 0.001              | 9,124 (45.2%)                                                 | 5,346 (26.5%)                                      | 2.3 (2.2-2.4)          | < 0.001              |
|                  | GERD                    | 3,441 (14.4%)                                                 | 2,140 (8.9%)                                       | 1.7 (1.6-1.8)          | < 0.001              | 2,800 (13.9%)                                                 | 1,760 (8.7%)                                       | 1.7 (1.6-1.8)          | < 0.001              |
|                  | Malaise/Fatigue         | 1,972 (8.2%)                                                  | 1,122 (4.7%)                                       | 1.8 (1.7-2.0)          | < 0.001              | 1,574 (7.8%)                                                  | 917 (4.5%)                                         | 1.8 (1.6-1.9)          | < 0.001              |
|                  | Joint Pain/Myalgias     | 4,104 (17.1%)                                                 | 2,555 (10.7%)                                      | 1.7 (1.6-1.8)          | < 0.001              | 3,285 (16.3%)                                                 | 2,082 (10.3%)                                      | 1.7 (1.6-1.8)          | < 0.001              |
|                  | Constipation            | 1,265 (5.3%)                                                  | 612 (2.6%)                                         | 2.1 (1.9-2.3)          | < 0.001              | 1,017 (5.0%)                                                  | 511 (2.5%)                                         | 2.0 (1.8-2.3)          | < 0.001              |
|                  | Insomnia                | 963 (4.0%)                                                    | 522 (2.2%)                                         | 1.9 (1.7-2.1)          | < 0.001              | 774 (3.8%)                                                    | 436 (2.2%)                                         | 1.8 (1.6-2.0)          | < 0.001              |

|                |                                        |                         |                |               |               |               |                |               |               |         |
|----------------|----------------------------------------|-------------------------|----------------|---------------|---------------|---------------|----------------|---------------|---------------|---------|
|                | Polyuria                               | 1,036 (4.3%)            | 599 (2.5%)     | 1.8 (1.6-2.0) | < 0.001       | 849 (4.2%)    | 511 (2.5%)     | 1.7 (1.5-1.9) | < 0.001       |         |
|                | Weakness                               | 1,306 (5.4%)            | 683 (2.9%)     | 2.0 (1.8-2.2) | < 0.001       | 1,034 (5.1%)  | 577 (2.9%)     | 1.8 (1.7-2.0) | < 0.001       |         |
|                | Abdominal Pain                         | 2,146 (9.0%)            | 1,241 (5.2%)   | 1.8 (1.7-1.9) | < 0.001       | 1,725 (8.6%)  | 1,041 (5.2%)   | 1.7 (1.6-1.9) | < 0.001       |         |
|                | Headache                               | 1,089 (4.5%)            | 586 (2.4%)     | 1.9 (1.7-2.1) | < 0.001       | 848 (4.2%)    | 480 (2.4%)     | 1.8 (1.6-2.0) | < 0.001       |         |
|                | Nausea                                 | 769 (3.2%)              | 350 (1.5%)     | 2.2 (2.0-2.5) | < 0.001       | 576 (2.9%)    | 289 (1.3%)     | 2.0 (1.8-2.3) | < 0.001       |         |
|                | Amnesia                                | 863 (3.6%)              | 493 (2.1%)     | 1.8 (1.6-2.0) | < 0.001       | 681 (3.4%)    | 404 (2.0%)     | 1.7 (1.5-1.9) | < 0.001       |         |
|                | Gallstones                             | 344 (1.4%)              | 155 (0.6%)     | 2.2 (1.8-2.7) | < 0.001       | 267 (1.3%)    | 132 (0.7%)     | 2.0 (1.7-2.5) | < 0.001       |         |
|                | <b>Entire Study Period (0-3 Years)</b> | Osteopenia/Osteoporosis | 5,449 (22.7%)  | 2,661 (11.1%) | 2.4 (2.2-2.5) | < 0.001       | 4,447 (22.0%)  | 2,221 (11.0%) | 2.3 (2.2-2.4) | < 0.001 |
|                |                                        | Fractures               | 1,836 (7.7%)   | 1,254 (5.2%)  | 1.5 (1.4-1.6) | < 0.001       | 1,450 (7.2%)   | 1,044 (5.2%)  | 1.4 (1.3-1.5) | < 0.001 |
|                |                                        | Urolithiasis            | 1,600 (6.7%)   | 569 (2.4%)    | 2.9 (2.7-3.2) | < 0.001       | 1,262 (6.3%)   | 470 (2.3%)    | 2.8 (2.5-3.1) | < 0.001 |
|                |                                        | MDD                     | 3,962 (16.5%)  | 2,751 (11.5%) | 1.5 (1.4-1.6) | < 0.001       | 3,218 (16.0%)  | 2,253 (11.2%) | 1.5 (1.4-1.6) | < 0.001 |
|                |                                        | Anxiety Disorders       | 3,824 (16.0%)  | 2,672 (11.1%) | 1.5 (1.4-1.6) | < 0.001       | 3,097 (15.4%)  | 2,177 (10.8%) | 1.5 (1.4-1.6) | < 0.001 |
|                |                                        | HTN                     | 13,639 (56.9%) | 9,749 (40.7%) | 1.9 (1.9-2.0) | < 0.001       | 11,187 (55.5%) | 8,114 (40.2%) | 1.9 (1.8-1.9) | < 0.001 |
|                |                                        | GERD                    | 5,619 (23.4%)  | 4,151 (17.3%) | 1.5 (1.4-1.5) | < 0.001       | 4,602 (22.8%)  | 3,430 (17.0%) | 1.4 (1.4-1.5) | < 0.001 |
|                |                                        | Malaise/Fatigue         | 4,565 (19.0%)  | 2,947 (12.3%) | 1.7 (1.6-1.8) | < 0.001       | 3,687 (18.3%)  | 2,428 (12.0%) | 1.6 (1.5-1.7) | < 0.001 |
|                |                                        | Joint Pain/Myalgias     | 7,759 (32.4%)  | 5,589 (23.3%) | 1.6 (1.5-1.6) | < 0.001       | 6,266 (31.1%)  | 4,591 (22.8%) | 1.5 (1.5-1.6) | < 0.001 |
| Constipation   |                                        | 2,874 (12.0%)           | 1,577 (6.6%)   | 1.9 (1.8-2.1) | < 0.001       | 2,335 (11.6%) | 1,316 (6.5%)   | 1.9 (1.7-2.0) | < 0.001       |         |
| Insomnia       |                                        | 1,999 (8.3%)            | 1,193 (5.0%)   | 1.7 (1.6-1.9) | < 0.001       | 1,592 (7.9%)  | 994 (4.9%)     | 1.7 (1.5-1.8) | < 0.001       |         |
| Polyuria       |                                        | 2,371 (9.9%)            | 1,427 (6.0%)   | 1.7 (1.6-1.9) | < 0.001       | 1,905 (9.4%)  | 1,205 (6.0%)   | 1.6 (1.5-1.8) | < 0.001       |         |
| Weakness       |                                        | 3,145 (13.1%)           | 1,992 (8.3%)   | 1.7 (1.6-1.8) | < 0.001       | 2,522 (12.5%) | 1,670 (8.3%)   | 1.6 (1.5-1.7) | < 0.001       |         |
| Abdominal Pain |                                        | 4,906 (20.5%)           | 3,417 (14.3%)  | 1.5 (1.5-1.6) | < 0.001       | 3,979 (19.7%) | 2,844 (14.1%)  | 1.5 (1.4-1.6) | < 0.001       |         |
| Headache       |                                        | 2,719 (11.3%)           | 1,772 (7.4%)   | 1.6 (1.5-1.7) | < 0.001       | 2,155 (10.7%) | 1,453 (7.2%)   | 1.5 (1.4-1.7) | < 0.001       |         |
| Nausea         |                                        | 1,941 (8.1%)            | 1,115 (4.7%)   | 1.8 (1.7-1.9) | < 0.001       | 1,518 (7.5%)  | 919 (4.6%)     | 1.7 (1.6-1.9) | < 0.001       |         |
| Amnesia        | 1,852 (7.7%)                           | 1,173 (4.9%)            | 1.6 (1.5-1.8)  | < 0.001       | 1,484 (7.4%)  | 965 (4.8%)    | 1.6 (1.5-1.7)  | < 0.001       |               |         |
| Gallstones     | 883 (3.7%)                             | 532 (2.2%)              | 1.7 (1.5-1.9)  | < 0.001       | 708 (3.5%)    | 442 (2.2%)    | 1.6 (1.4-1.8)  | < 0.001       |               |         |

Abbreviations: PHP, primary hyperparathyroidism; PTH, parathyroid hormone; MDD, major depressive disorder; HTN, hypertension; GERD, gastroesophageal reflux disease; CI, confidence interval

<sup>a</sup>Statistical significance defined as  $P < 0.003$

**eTable 6:** Associated Diagnoses and Symptoms in Patients at High Risk of PHP With Hypercalcemia and PTH  $\geq 65$  (n = 14,959) or 100 (n = 7,387) pg/mL Without a Documented Diagnosis of PHP Compared to Matched Controls

|                  | Diagnosis               | High-Risk PHP PTH $\geq 65$<br>(n = 14,959<br>after matching) | Matched Controls<br>(n = 7,386<br>after matching) | Odds Ratio<br>(95% CI) | *P value   | High-Risk PHP PTH $\geq 100$<br>(n = 7,386<br>after matching) | Matched Controls<br>(n = 7,386<br>after matching) | Odds Ratio<br>(95% CI) | *P value |
|------------------|-------------------------|---------------------------------------------------------------|---------------------------------------------------|------------------------|------------|---------------------------------------------------------------|---------------------------------------------------|------------------------|----------|
| <b>0-1 Year</b>  | Osteopenia/Osteoporosis | 1,859 (12.4%)                                                 | 886 (5.9%)                                        | 2.3 (2.1-2.5)          | < 0.001    | 826 (11.2%)                                                   | 388 (5.3%)                                        | 2.3 (2.0-2.6)          | < 0.001  |
|                  | Fractures               | 479 (3.2%)                                                    | 360 (2.4%)                                        | 1.3 (1.2-1.5)          | < 0.001    | 197 (2.7%)                                                    | 180 (2.4%)                                        | 1.1 (0.9-1.3)          | 0.38     |
|                  | Urolithiasis            | 532 (3.6%)                                                    | 187 (1.3%)                                        | 2.9 (2.5-3.4)          | < 0.001    | 234 (3.2%)                                                    | 99 (1.3%)                                         | 2.4 (1.9-3.1)          | < 0.001  |
|                  | MDD                     | 1,395 (9.3%)                                                  | 1,047 (7.0%)                                      | 1.4 (1.3-1.5)          | < 0.001    | 583 (7.9%)                                                    | 467 (6.3%)                                        | 1.3 (1.1-1.4)          | < 0.001  |
|                  | Anxiety Disorders       | 1,330 (8.9%)                                                  | 1,026 (6.9%)                                      | 1.3 (1.2-1.4)          | < 0.001    | 560 (7.6%)                                                    | 451 (6.1%)                                        | 1.3 (1.1-1.4)          | < 0.001  |
|                  | HTN                     | 6,433 (43.0%)                                                 | 4,232 (28.3%)                                     | 1.9 (1.8-2.0)          | < 0.001    | 2,857 (38.7%)                                                 | 2,137 (28.9%)                                     | 1.5 (1.4-1.7)          | < 0.001  |
|                  | GERD                    | 2,047 (13.7%)                                                 | 1,476 (9.9%)                                      | 1.4 (1.3-1.6)          | < 0.001    | 880 (11.9%)                                                   | 707 (9.6%)                                        | 1.3 (1.2-1.4)          | < 0.001  |
|                  | Malaise/Fatigue         | 1,412 (9.4%)                                                  | 755 (5.0%)                                        | 2.0 (1.8-2.1)          | < 0.001    | 621 (8.4%)                                                    | 460 (6.2%)                                        | 1.4 (1.2-1.6)          | < 0.001  |
|                  | Joint Pain/Myalgias     | 2,358 (15.8%)                                                 | 1,846 (12.3%)                                     | 1.3 (1.2-1.4)          | < 0.001    | 1,033 (14.0%)                                                 | 807 (10.9%)                                       | 1.3 (1.2-1.5)          | < 0.001  |
|                  | Constipation            | 851 (5.7%)                                                    | 453 (3.0%)                                        | 1.9 (1.7-2.2)          | < 0.001    | 347 (4.7%)                                                    | 243 (3.3%)                                        | 1.5 (1.2-1.7)          | < 0.001  |
|                  | Insomnia                | 584 (3.9%)                                                    | 351 (2.3%)                                        | 1.7 (1.5-1.9)          | < 0.001    | 250 (3.4%)                                                    | 194 (2.6%)                                        | 1.3 (1.1-1.6)          | 0.007    |
|                  | Polyuria                | 599 (4.0%)                                                    | 377 (2.5%)                                        | 1.6 (1.4-1.8)          | < 0.001    | 246 (3.3%)                                                    | 191 (2.6%)                                        | 1.3 (1.1-1.6)          | 0.008    |
|                  | Weakness                | 936 (6.3%)                                                    | 497 (3.3%)                                        | 1.9 (1.7-2.2)          | < 0.001    | 402 (5.4%)                                                    | 299 (4.0%)                                        | 1.4 (1.2-1.6)          | < 0.001  |
|                  | Abdominal Pain          | 1,439 (9.6%)                                                  | 918 (6.1%)                                        | 1.6 (1.5-1.8)          | < 0.001    | 596 (8.1%)                                                    | 534 (7.2%)                                        | 1.1 (1.0-1.3)          | 0.06     |
|                  | Headache                | 765 (5.1%)                                                    | 496 (3.3%)                                        | 1.6 (1.4-1.8)          | < 0.001    | 309 (4.2%)                                                    | 268 (3.6%)                                        | 1.2 (1.0-1.4)          | 0.08     |
|                  | Nausea                  | 538 (3.6%)                                                    | 275 (1.8%)                                        | 2.0 (1.7-2.3)          | < 0.001    | 226 (3.1%)                                                    | 166 (2.2%)                                        | 1.4 (1.1-1.7)          | 0.002    |
| Amnesia          | 523 (3.5%)              | 355 (2.4%)                                                    | 1.5 (1.3-1.7)                                     | < 0.001                | 213 (2.9%) | 164 (2.2%)                                                    | 1.3 (1.1-1.6)                                     | 0.01                   |          |
| Gallstones       | 266 (1.8%)              | 149 (1.0%)                                                    | 1.8 (1.5-2.2)                                     | < 0.001                | 124 (1.7%) | 88 (1.2%)                                                     | 1.4 (1.1-1.9)                                     | 0.01                   |          |
| <b>1-2 Years</b> | Osteopenia/Osteoporosis | 1,914 (12.8%)                                                 | 693 (4.6%)                                        | 3.0 (2.8-3.3)          | < 0.001    | 838 (11.3%)                                                   | 379 (5.1%)                                        | 2.4 (2.1-2.7)          | < 0.001  |
|                  | Fractures               | 418 (2.8%)                                                    | 241 (1.6%)                                        | 1.8 (1.5-2.1)          | < 0.001    | 173 (2.3%)                                                    | 137 (1.9%)                                        | 1.3 (1.0-1.6)          | 0.04     |
|                  | Urolithiasis            | 458 (3.1%)                                                    | 135 (0.9%)                                        | 3.5 (2.9-4.2)          | < 0.001    | 212 (2.9%)                                                    | 60 (0.8%)                                         | 3.6 (2.7-4.8)          | < 0.001  |
|                  | MDD                     | 1,346 (9.0%)                                                  | 734 (4.9%)                                        | 1.9 (1.7-2.1)          | < 0.001    | 570 (7.7%)                                                    | 405 (5.5%)                                        | 1.4 (1.3-1.6)          | < 0.001  |
|                  | Anxiety Disorders       | 1,205 (8.1%)                                                  | 721 (4.9%)                                        | 1.8 (1.6-1.9)          | < 0.001    | 512 (6.9%)                                                    | 365 (4.9%)                                        | 1.4 (1.2-1.6)          | < 0.001  |
|                  | HTN                     | 6,297 (42.1%)                                                 | 2,991 (20.0%)                                     | 2.9 (2.8-3.1)          | < 0.001    | 2,786 (37.7%)                                                 | 1,763 (23.9%)                                     | 1.9 (1.8-2.1)          | < 0.001  |
|                  | GERD                    | 1,877 (12.5%)                                                 | 1,051 (7.0%)                                      | 1.9 (1.8-2.1)          | < 0.001    | 774 (10.5%)                                                   | 542 (7.3%)                                        | 1.5 (1.3-1.7)          | < 0.001  |
|                  | Malaise/Fatigue         | 1,058 (7.1%)                                                  | 489 (3.3%)                                        | 2.3 (2.0-2.5)          | < 0.001    | 441 (6.0%)                                                    | 327 (4.4%)                                        | 1.4 (1.2-1.6)          | < 0.001  |
|                  | Joint Pain/Myalgias     | 2,298 (15.4%)                                                 | 1,264 (8.5%)                                      | 2.0 (1.8-2.1)          | < 0.001    | 1,007 (13.6%)                                                 | 712 (9.6%)                                        | 1.5 (1.4-1.6)          | < 0.001  |
|                  | Constipation            | 706 (4.7%)                                                    | 298 (2.0%)                                        | 2.4 (2.1-2.8)          | < 0.001    | 295 (4.0%)                                                    | 156 (2.1%)                                        | 1.9 (1.6-2.3)          | < 0.001  |
|                  | Insomnia                | 488 (3.3%)                                                    | 275 (1.8%)                                        | 1.8 (1.6-2.1)          | < 0.001    | 209 (2.8%)                                                    | 158 (2.1%)                                        | 1.3 (1.1-1.6)          | 0.007    |
|                  | Polyuria                | 543 (3.6%)                                                    | 266 (1.8%)                                        | 2.1 (1.8-2.4)          | < 0.001    | 242 (3.3%)                                                    | 159 (2.2%)                                        | 1.5 (1.3-1.9)          | < 0.001  |
|                  | Weakness                | 636 (4.3%)                                                    | 297 (2.0%)                                        | 2.2 (1.9-2.5)          | < 0.001    | 279 (3.8%)                                                    | 200 (2.7%)                                        | 1.4 (1.2-1.7)          | < 0.001  |
|                  | Abdominal Pain          | 1,179 (7.9%)                                                  | 590 (3.9%)                                        | 2.1 (1.9-2.3)          | < 0.001    | 489 (6.6%)                                                    | 349 (4.7%)                                        | 1.3 (1.2-1.6)          | < 0.001  |
|                  | Headache                | 644 (4.3%)                                                    | 282 (1.9%)                                        | 2.3 (2.0-2.7)          | < 0.001    | 275 (3.7%)                                                    | 181 (2.5%)                                        | 1.5 (1.3-1.9)          | < 0.001  |
|                  | Nausea                  | 400 (2.7%)                                                    | 150 (1.0%)                                        | 2.7 (2.2-3.3)          | < 0.001    | 176 (2.4%)                                                    | 113 (1.5%)                                        | 1.6 (1.2-2.0)          | < 0.001  |
| Amnesia          | 459 (3.1%)              | 203 (1.4%)                                                    | 2.3 (1.9-2.7)                                     | < 0.001                | 194 (2.6%) | 125 (1.7%)                                                    | 1.6 (1.2-2.0)                                     | < 0.001                |          |
| Gallstones       | 189 (1.3%)              | 74 (0.5%)                                                     | 2.6 (2.0-3.4)                                     | < 0.001                | 92 (1.2%)  | 36 (0.5%)                                                     | 2.6 (1.7-3.8)                                     | < 0.001                |          |
| <b>2-3 Years</b> | Osteopenia/Osteoporosis | 2,059 (13.8%)                                                 | 575 (3.8%)                                        | 4.0 (3.6-4.4)          | < 0.001    | 887 (12.0%)                                                   | 421 (5.7%)                                        | 2.3 (2.0-2.5)          | < 0.001  |
|                  | Fractures               | 474 (3.2%)                                                    | 163 (1.1%)                                        | 3.0 (2.5-3.6)          | < 0.001    | 186 (2.5%)                                                    | 127 (1.7%)                                        | 1.5 (1.2-1.9)          | < 0.001  |
|                  | Urolithiasis            | 438 (2.9%)                                                    | 94 (0.6%)                                         | 4.8 (3.8-6.0)          | < 0.001    | 201 (2.7%)                                                    | 61 (0.8%)                                         | 3.4 (2.5-4.5)          | < 0.001  |
|                  | MDD                     | 1,429 (9.6%)                                                  | 533 (3.6%)                                        | 2.9 (2.6-3.2)          | < 0.001    | 591 (8.0%)                                                    | 409 (5.5%)                                        | 1.5 (1.3-1.7)          | < 0.001  |
|                  | Anxiety Disorders       | 1,272 (8.5%)                                                  | 531 (3.6%)                                        | 2.5 (2.3-2.8)          | < 0.001    | 547 (7.4%)                                                    | 502 (5.4%)                                        | 1.4 (1.2-1.6)          | < 0.001  |
|                  | HTN                     | 6,469 (43.2%)                                                 | 2,295 (15.3%)                                     | 4.2 (4.0-4.4)          | < 0.001    | 2,873 (38.9%)                                                 | 1,858 (25.2%)                                     | 1.9 (1.8-2.0)          | < 0.001  |
|                  | GERD                    | 1,911 (12.8%)                                                 | 830 (5.5%)                                        | 2.5 (2.3-2.8)          | < 0.001    | 791 (10.7%)                                                   | 609 (8.2%)                                        | 1.3 (1.2-1.5)          | < 0.001  |
|                  | Malaise/Fatigue         | 1,101 (7.4%)                                                  | 386 (2.6%)                                        | 3.0 (2.7-3.4)          | < 0.001    | 494 (6.7%)                                                    | 304 (4.1%)                                        | 1.7 (1.4-1.9)          | < 0.001  |
|                  | Joint Pain/Myalgias     | 2,313 (15.5%)                                                 | 952 (6.4%)                                        | 2.7 (2.5-2.9)          | < 0.001    | 972 (13.2%)                                                   | 733 (9.9%)                                        | 1.4 (1.2-1.5)          | < 0.001  |
|                  | Constipation            | 688 (4.6%)                                                    | 246 (1.6%)                                        | 2.9 (2.5-3.3)          | < 0.001    | 280 (3.8%)                                                    | 183 (2.5%)                                        | 1.6 (1.3-1.9)          | < 0.001  |

|                                        |                         |               |               |               |         |               |               |               |         |
|----------------------------------------|-------------------------|---------------|---------------|---------------|---------|---------------|---------------|---------------|---------|
| <b>Entire Study Period (0-3 Years)</b> | Insomnia                | 516 (3.5%)    | 205 (1.4%)    | 2.6 (2.2-3.0) | < 0.001 | 220 (3.0%)    | 165 (2.2%)    | 1.3 (1.1-1.6) | 0.005   |
|                                        | Polyuria                | 584 (3.9%)    | 198 (1.3%)    | 3.0 (2.6-3.6) | < 0.001 | 235 (3.2%)    | 160 (2.2%)    | 1.5 (1.2-1.9) | < 0.001 |
|                                        | Weakness                | 699 (4.7%)    | 201 (1.3%)    | 3.6 (3.1-4.2) | < 0.001 | 303 (4.1%)    | 185 (2.5%)    | 1.7 (1.4-2.0) | < 0.001 |
|                                        | Abdominal Pain          | 1,193 (8.0%)  | 474 (3.2%)    | 2.6 (2.4-3.0) | < 0.001 | 497 (6.7%)    | 366 (5.0%)    | 1.4 (1.2-1.6) | < 0.001 |
|                                        | Headache                | 603 (4.0%)    | 233 (1.6%)    | 2.7 (2.3-3.1) | < 0.001 | 256 (3.5%)    | 161 (2.2%)    | 1.6 (1.3-2.0) | < 0.001 |
|                                        | Nausea                  | 396 (2.6%)    | 160 (1.1%)    | 2.5 (2.1-3.0) | < 0.001 | 157 (2.1%)    | 89 (1.2%)     | 1.8 (1.4-2.3) | < 0.001 |
|                                        | Amnesia                 | 471 (3.1%)    | 174 (1.2%)    | 2.8 (2.3-3.3) | < 0.001 | 175 (2.4%)    | 143 (1.9%)    | 1.2 (1.0-1.5) | 0.07    |
|                                        | Gallstones              | 194 (1.3%)    | 70 (0.5%)     | 2.8 (2.1-3.7) | < 0.001 | 81 (1.1%)     | 52 (0.7%)     | 1.6 (1.1-2.2) | 0.01    |
|                                        | Osteopenia/Osteoporosis | 3,152 (21.1%) | 1,426 (9.5%)  | 2.5 (2.4-2.7) | < 0.001 | 1,422 (19.3%) | 726 (9.8%)    | 2.2 (2.0-2.4) | < 0.001 |
|                                        | Fractures               | 992 (6.6%)    | 632 (4.2%)    | 1.6 (1.5-1.8) | < 0.001 | 409 (5.5%)    | 352 (4.8%)    | 1.2 (1.0-1.4) | 0.03    |
|                                        | Urolithiasis            | 887 (5.9%)    | 317 (2.1%)    | 2.9 (2.6-3.3) | < 0.001 | 414 (5.6%)    | 135 (1.8%)    | 3.2 (2.6-3.9) | < 0.001 |
|                                        | MDD                     | 2,252 (15.1%) | 1,468 (9.8%)  | 1.6 (1.5-1.7) | < 0.001 | 923 (12.5%)   | 690 (9.3%)    | 1.4 (1.2-1.5) | < 0.001 |
|                                        | Anxiety Disorders       | 2,168 (4.5%)  | 1,475 (9.9%)  | 1.5 (1.4-1.7) | < 0.001 | 942 (12.8%)   | 709 (9.6%)    | 1.4 (1.2-1.5) | < 0.001 |
|                                        | HTN                     | 7,944 (53.1%) | 5,039 (33.7%) | 2.2 (2.1-2.3) | < 0.001 | 3,603 (48.8%) | 2,708 (36.7%) | 1.6 (1.5-1.8) | < 0.001 |
|                                        | GERD                    | 3,220 (21.5%) | 2,131 (14.6%) | 1.7 (1.6-1.8) | < 0.001 | 1,400 (19.0%) | 1,136 (15.4%) | 1.3 (1.2-1.4) | < 0.001 |
|                                        | Malaise/Fatigue         | 2,554 (17.1%) | 1,308 (8.7%)  | 2.1 (2.0-2.3) | < 0.001 | 1,115 (15.1%) | 802 (10.9%)   | 1.5 (1.3-1.6) | < 0.001 |
|                                        | Joint Pain/Myalgias     | 4,341 (29.0%) | 2,911 (19.5%) | 1.7 (1.6-1.8) | < 0.001 | 1,925 (26.1%) | 1,556 (21.1%) | 1.3 (1.2-1.4) | < 0.001 |
|                                        | Constipation            | 1,613 (10.8%) | 800 (5.3%)    | 2.1 (2.0-2.3) | < 0.001 | 676 (9.2%)    | 443 (6.0%)    | 1.6 (1.4-1.8) | < 0.001 |
|                                        | Insomnia                | 1,075 (7.2%)  | 612 (4.1%)    | 1.8 (1.6-2.0) | < 0.001 | 457 (6.2%)    | 308 (4.2%)    | 1.5 (1.3-1.8) | < 0.001 |
|                                        | Polyuria                | 1,317 (8.8%)  | 694 (4.6%)    | 2.0 (1.8-2.2) | < 0.001 | 551 (7.5%)    | 392 (5.3%)    | 1.4 (1.3-1.6) | < 0.001 |
|                                        | Weakness                | 1,723 (11.5%) | 837 (5.6%)    | 2.2 (2.0-2.4) | < 0.001 | 757 (10.2%)   | 552 (7.5%)    | 1.4 (1.3-1.6) | < 0.001 |
|                                        | Abdominal Pain          | 2,760 (18.4%) | 1,595 (10.7%) | 1.9 (1.8-2.2) | < 0.001 | 1,167 (15.8%) | 935 (12.7%)   | 1.3 (1.2-1.4) | < 0.001 |
|                                        | Headache                | 1,523 (10.2%) | 855 (5.7%)    | 1.9 (1.7-2.0) | < 0.001 | 635 (8.6%)    | 471 (6.4%)    | 1.4 (1.2-1.6) | < 0.001 |
|                                        | Nausea                  | 1,027 (6.9%)  | 502 (3.4%)    | 2.1 (1.9-2.4) | < 0.001 | 443 (6.0%)    | 331 (4.5%)    | 1.4 (1.2-1.6) | < 0.001 |
|                                        | Amnesia                 | 1,040 (7.0%)  | 592 (4.0%)    | 1.8 (1.6-2.0) | < 0.001 | 428 (5.8%)    | 324 (4.4%)    | 1.3 (1.2-1.6) | < 0.001 |
|                                        | Gallstones              | 510 (3.4%)    | 253 (1.7%)    | 2.1 (1.8-2.4) | < 0.001 | 234 (3.2%)    | 157 (2.1%)    | 1.5 (1.2-1.8) | < 0.001 |

Abbreviations: PHP, primary hyperparathyroidism; PTH, parathyroid hormone; MDD, major depressive disorder; HTN, hypertension; GERD, gastroesophageal reflux disease; CI, confidence interval

<sup>a</sup>Statistical significance defined as  $P < 0.003$

**eTable 7:** Comparing Diagnoses and Symptoms in Patients at High Risk of PHP With Hypercalcemia and PTH  $\geq 40$  (n = 23,969) or 50 pg/mL (n = 20,176) Without a Documented Diagnosis With Those Diagnosed (n = 13,136)

|                         | Diagnosis               | High-Risk PHP PTH $\geq 40$ (n = 13,119 after matching) | Diagnosed (n = 13,119 after matching) | Odds Ratio (95% CI) | <sup>a</sup> P value | High-Risk PHP PTH $\geq 50$ (n = 12,842 after matching) | Diagnosed (n = 12,842 after matching) | Odds Ratio (95% CI) | <sup>a</sup> P value |
|-------------------------|-------------------------|---------------------------------------------------------|---------------------------------------|---------------------|----------------------|---------------------------------------------------------|---------------------------------------|---------------------|----------------------|
| <b>0-1 Year</b>         | Osteopenia/Osteoporosis | 2,011 (15.3%)                                           | 2,837 (21.6%)                         | 0.7 (0.6-0.7)       | <0.001               | 1,970 (15.3%)                                           | 2,797 (21.8%)                         | 0.7 (0.6-0.7)       | <0.001               |
|                         | Fractures               | 556 (4.2%)                                              | 544 (4.1%)                            | 1.0 (0.9-1.2)       | 0.71                 | 551 (4.3%)                                              | 530 (4.1%)                            | 1.0 (0.9-1.2)       | 0.51                 |
|                         | Urolithiasis            | 665 (5.1%)                                              | 1,166 (8.9%)                          | 0.5 (0.5-0.6)       | <0.001               | 620 (4.8%)                                              | 1,132 (8.8%)                          | 0.5 (0.5-0.6)       | <0.001               |
|                         | MDD                     | 1,684 (12.8%)                                           | 1,657 (12.6%)                         | 1.0 (0.9-1.1)       | 0.62                 | 1,585 (12.3%)                                           | 1,606 (12.5%)                         | 1.0 (0.9-1.1)       | 0.69                 |
|                         | Anxiety Disorders       | 1,597 (12.2%)                                           | 1,407 (10.7%)                         | 1.2 (1.1-1.2)       | <0.001               | 1,549 (12.1%)                                           | 1,359 (10.6%)                         | 1.2 (1.1-1.3)       | <0.001               |
|                         | HTN                     | 7,081 (54.0%)                                           | 6,863 (52.3%)                         | 1.1 (1.0-1.1)       | 0.007                | 6,804 (53.0%)                                           | 6,761 (52.6%)                         | 1.0 (1.0-1.1)       | 0.59                 |
|                         | GERD                    | 2,312 (17.6%)                                           | 2,411 (18.4%)                         | 1.0 (0.9-1.0)       | 0.11                 | 2,252 (17.5%)                                           | 2,364 (18.4%)                         | 0.9 (0.9-1.0)       | 0.07                 |
|                         | Malaise/Fatigue         | 1,686 (12.9%)                                           | 1,775 (13.5%)                         | 0.9 (0.9-1.0)       | 0.10                 | 1,593 (12.4%)                                           | 1,735 (13.5%)                         | 0.9 (0.8-1.0)       | 0.008                |
|                         | Joint Pain/Myalgias     | 2,793 (21.3%)                                           | 2,785 (21.2%)                         | 1.0 (0.9-1.1)       | 0.90                 | 2,631 (20.5%)                                           | 2,725 (21.2%)                         | 1.0 (0.9-1.0)       | 0.15                 |
|                         | Constipation            | 974 (7.4%)                                              | 1,024 (7.8%)                          | 0.9 (0.9-1.0)       | 0.24                 | 950 (7.4%)                                              | 1,005 (7.8%)                          | 0.9 (0.9-1.0)       | 0.20                 |
|                         | Insomnia                | 742 (5.7%)                                              | 602 (4.6%)                            | 1.2 (1.1-1.4)       | <0.001               | 699 (5.4%)                                              | 583 (4.5%)                            | 1.2 (1.1-1.4)       | <0.001               |
|                         | Polyuria                | 702 (5.4%)                                              | 790 (6.0%)                            | 0.9 (0.8-1.0)       | 0.02                 | 639 (5.0%)                                              | 773 (6.0%)                            | 0.8 (0.7-0.9)       | <0.001               |
|                         | Weakness                | 1,150 (8.8%)                                            | 1,226 (9.3%)                          | 0.9 (0.9-1.0)       | 0.10                 | 1,068 (8.3%)                                            | 1,195 (9.3%)                          | 0.9 (0.8-1.0)       | 0.005                |
|                         | Abdominal Pain          | 1,780 (13.6%)                                           | 1,709 (13.0%)                         | 1.0 (1.0-1.1)       | 0.20                 | 1,683 (13.1%)                                           | 1,661 (12.9%)                         | 1.0 (0.9-1.1)       | 0.68                 |
|                         | <b>1-2 Years</b>        | Headache                                                | 929 (7.1%)                            | 926 (7.1%)          | 1.0 (0.9-1.1)        | 0.94                                                    | 856 (6.7%)                            | 897 (7.0%)          | 1.0 (0.9-1.0)        |
| Nausea                  |                         | 741 (5.6%)                                              | 684 (5.2%)                            | 1.1 (1.0-1.2)       | 0.12                 | 672 (5.2%)                                              | 660 (5.1%)                            | 1.0 (0.9-1.1)       | 0.74                 |
| Amnesia                 |                         | 586 (4.5%)                                              | 614 (4.7%)                            | 1.0 (0.8-1.1)       | 0.41                 | 557 (4.3%)                                              | 609 (4.7%)                            | 0.9 (0.8-1.0)       | 0.12                 |
| Gallstones              |                         | 294 (2.2%)                                              | 307 (2.3%)                            | 1.0 (0.8-1.1)       | 0.59                 | 293 (2.3%)                                              | 301 (2.3%)                            | 1.0 (0.8-1.1)       | 0.74                 |
| Osteopenia/Osteoporosis |                         | 2,082 (15.9%)                                           | 2,836 (21.6%)                         | 0.7 (0.6-0.7)       | <0.001               | 2,059 (16.0%)                                           | 2,795 (21.8%)                         | 0.7 (0.6-0.7)       | <0.001               |
| Fractures               |                         | 507 (3.9%)                                              | 463 (3.5%)                            | 1.1 (1.0-1.2)       | 0.15                 | 479 (3.7%)                                              | 453 (3.5%)                            | 1.1 (0.9-1.2)       | 0.39                 |
| Urolithiasis            |                         | 571 (4.4%)                                              | 928 (7.1%)                            | 0.6 (0.5-0.7)       | <0.001               | 518 (4.0%)                                              | 903 (7.0%)                            | 0.6 (0.5-0.6)       | <0.001               |
| MDD                     |                         | 1,566 (11.9%)                                           | 1,520 (11.6%)                         | 1.0 (1.0-1.1)       | 0.38                 | 1,511 (11.8%)                                           | 1,476 (11.5%)                         | 1.0 (1.0-1.1)       | 0.50                 |
| Anxiety Disorders       |                         | 1,460 (11.1%)                                           | 1,275 (9.7%)                          | 1.2 (1.1-1.3)       | <0.001               | 1,390 (10.8%)                                           | 1,236 (9.6%)                          | 1.1 (1.1-1.2)       | 0.002                |
| HTN                     |                         | 6,946 (52.9%)                                           | 6,532 (49.8%)                         | 1.1 (1.1-1.2)       | <0.001               | 6,679 (52.0%)                                           | 6,446 (50.2%)                         | 1.1 (1.0-1.1)       | 0.004                |
| GERD                    |                         | 2,102 (16.0%)                                           | 2,254 (17.2%)                         | 0.9 (0.9-1.0)       | 0.01                 | 2,058 (16.0%)                                           | 2,211 (17.2%)                         | 0.9 (0.9-1.0)       | 0.01                 |
| Malaise/Fatigue         |                         | 1,258 (9.6%)                                            | 1,339 (10.2%)                         | 0.9 (0.9-1.0)       | 0.09                 | 1,206 (9.4%)                                            | 1,306 (10.2%)                         | 0.9 (0.8-1.0)       | 0.04                 |
| Joint Pain/Myalgias     |                         | 2,640 (20.1%)                                           | 2,569 (19.6%)                         | 1.0 (1.0-1.1)       | 0.27                 | 2,548 (19.8%)                                           | 2,506 (19.5%)                         | 1.0 (1.0-1.1)       | 0.51                 |
| Constipation            |                         | 765 (5.8%)                                              | 815 (6.2%)                            | 0.9 (0.8-1.0)       | 0.19                 | 747 (5.8%)                                              | 799 (6.2%)                            | 0.9 (0.8-1.0)       | 0.17                 |
| Insomnia                |                         | 620 (4.7%)                                              | 541 (4.1%)                            | 1.2 (1.0-1.3)       | 0.02                 | 558 (4.3%)                                              | 527 (4.1%)                            | 1.1 (0.9-1.2)       | 0.34                 |
| Polyuria                | 603 (4.6%)              | 659 (5.0%)                                              | 0.9 (0.8-1.0)                         | 0.11                | 593 (4.6%)           | 643 (5.0%)                                              | 0.9 (0.8-1.0)                         | 0.14                |                      |
| Weakness                | 792 (6.0%)              | 901 (6.9%)                                              | 0.9 (0.8-1.0)                         | 0.006               | 732 (5.7%)           | 880 (6.9%)                                              | 0.8 (0.7-0.9)                         | <0.001              |                      |
| Abdominal Pain          | 1,385 (10.6%)           | 1,435 (10.9%)                                           | 1.0 (0.9-1.0)                         | 0.32                | 1,290 (10.0%)        | 1,394 (10.9%)                                           | 0.9 (0.8-1.0)                         | 0.03                |                      |
| Headache                | 789 (6.0%)              | 703 (5.4%)                                              | 1.1 (1.0-1.3)                         | 0.02                | 718 (5.6%)           | 676 (5.3%)                                              | 1.1 (1.0-1.2)                         | 0.25                |                      |
| Nausea                  | 522 (4.0%)              | 472 (3.6%)                                              | 1.1 (1.0-1.3)                         | 0.11                | 467 (3.6%)           | 458 (3.6%)                                              | 1.0 (0.9-1.2)                         | 0.76                |                      |
| Amnesia                 | 487 (3.7%)              | 485 (3.7%)                                              | 1.0 (0.9-1.1)                         | 0.95                | 458 (3.6%)           | 476 (3.7%)                                              | 1.0 (0.8-1.1)                         | 0.55                |                      |
| Gallstones              | 210 (1.6%)              | 234 (1.8%)                                              | 0.9 (0.7-1.1)                         | 0.25                | 201 (1.6%)           | 229 (1.8%)                                              | 0.9 (0.7-1.1)                         | 0.17                |                      |
| <b>2-3 Years</b>        | Osteopenia/Osteoporosis | 2,237 (17.1%)                                           | 3,174 (24.2%)                         | 0.6 (0.6-0.7)       | <0.001               | 2,198 (17.1%)                                           | 3,132 (24.4%)                         | 0.6 (0.6-0.7)       | <0.001               |
|                         | Fractures               | 546 (4.2%)                                              | 496 (3.8%)                            | 1.1 (1.0-1.3)       | 0.11                 | 506 (3.9%)                                              | 485 (3.8%)                            | 1.0 (0.9-1.2)       | 0.50                 |
|                         | Urolithiasis            | 573 (4.4%)                                              | 952 (7.3%)                            | 0.6 (0.5-0.6)       | <0.001               | 525 (4.1%)                                              | 923 (7.2%)                            | 0.6 (0.5-0.6)       | <0.001               |
|                         | MDD                     | 1,658 (12.6%)                                           | 1,558 (11.9%)                         | 1.1 (1.0-1.2)       | 0.06                 | 1,583 (12.3%)                                           | 1,509 (11.8%)                         | 1.1 (1.0-1.1)       | 0.16                 |
|                         | Anxiety Disorders       | 1,518 (11.6%)                                           | 1,361 (10.4%)                         | 1.1 (1.0-1.2)       | 0.002                | 1,462 (11.4%)                                           | 1,314 (10.2%)                         | 1.1 (1.0-1.2)       | 0.003                |
|                         | HTN                     | 7,063 (53.8%)                                           | 6,625 (50.5%)                         | 1.1 (1.1-1.2)       | <0.001               | 6,796 (52.9%)                                           | 6,538 (50.9%)                         | 1.1 (1.0-1.1)       | 0.001                |
|                         | GERD                    | 2,174 (16.6%)                                           | 2,308 (17.6%)                         | 0.9 (0.9-1.0)       | 0.03                 | 2,135 (16.6%)                                           | 2,250 (17.5%)                         | 0.9 (0.9-1.0)       | 0.06                 |
|                         | Malaise/Fatigue         | 1,271 (9.7%)                                            | 1,383 (10.5%)                         | 0.9 (0.8-1.0)       | 0.02                 | 1,234 (9.6%)                                            | 1,356 (10.6%)                         | 0.9 (0.8-1.0)       | 0.01                 |
|                         | Joint Pain/Myalgias     | 2,637 (20.1%)                                           | 2,615 (19.9%)                         | 1.0 (1.0-1.1)       | 0.73                 | 2,508 (19.5%)                                           | 2,560 (19.9%)                         | 1.0 (0.9-1.0)       | 0.41                 |
|                         | Constipation            | 785 (6.0%)                                              | 775 (5.9%)                            | 1.0 (0.9-1.1)       | 0.79                 | 775 (6.0%)                                              | 762 (5.9%)                            | 1.0 (0.9-1.1)       | 0.73                 |
| Insomnia                | 633 (4.8%)              | 577 (4.4%)                                              | 1.1 (1.0-1.2)                         | 0.10                | 598 (4.7%)           | 558 (4.3%)                                              | 1.1 (1.0-1.2)                         | 0.23                |                      |

|                                        |                         |               |               |               |            |               |               |               |        |
|----------------------------------------|-------------------------|---------------|---------------|---------------|------------|---------------|---------------|---------------|--------|
|                                        | Polyuria                | 657 (5.0%)    | 665 (5.1%)    | 1.0 (0.9-1.1) | 0.82       | 628 (4.9%)    | 656 (5.1%)    | 1.0 (0.9-1.1) | 0.42   |
|                                        | Weakness                | 841 (6.4%)    | 845 (6.4%)    | 1.0 (0.9-1.1) | 0.92       | 802 (6.2%)    | 828 (6.4%)    | 1.0 (0.9-1.1) | 0.51   |
|                                        | Abdominal Pain          | 1,410 (10.7%) | 1,369 (10.4%) | 1.0 (1.0-1.1) | 0.41       | 1,333 (10.4%) | 1,334 (10.4%) | 1.0 (0.9-1.1) | 0.98   |
|                                        | Headache                | 753 (5.7%)    | 721 (5.5%)    | 1.0 (0.9-1.2) | 0.39       | 666 (5.2%)    | 698 (5.4%)    | 1.0 (0.9-1.1) | 0.37   |
|                                        | Nausea                  | 509 (3.9%)    | 475 (3.6%)    | 1.1 (0.9-1.2) | 0.27       | 467 (3.6%)    | 462 (3.6%)    | 1.0 (0.9-1.2) | 0.87   |
|                                        | Amnesia                 | 511 (3.9%)    | 506 (3.9%)    | 1.0 (0.9-1.1) | 0.87       | 488 (3.8%)    | 498 (3.9%)    | 1.0 (0.9-1.1) | 0.75   |
|                                        | Gallstones              | 227 (1.7%)    | 226 (1.7%)    | 1.0 (0.8-1.2) | 0.96       | 211 (1.6%)    | 224 (1.7%)    | 0.9 (0.8-1.1) | 0.53   |
| <b>Entire Study Period (0-3 Years)</b> | Osteopenia/Osteoporosis | 3,355 (25.6%) | 4,856 (37.0%) | 0.6 (0.6-0.6) | <0.001     | 3,326 (25.9%) | 4,787 (37.3%) | 0.6 (0.6-0.6) | <0.001 |
|                                        | Fractures               | 1,141 (8.7%)  | 1,112 (8.5%)  | 1.0 (0.9-1.1) | 0.52       | 1,091 (8.5%)  | 1,089 (8.5%)  | 1.0 (0.9-1.1) | 0.96   |
|                                        | Urolithiasis            | 1,101 (8.4%)  | 1,905 (14.5%) | 0.5 (0.5-0.6) | <0.001     | 1,010 (7.9%)  | 1,847 (14.4%) | 0.5 (0.5-0.6) | <0.001 |
|                                        | MDD                     | 2,646 (20.2%) | 2,675 (20.4%) | 1.0 (0.9-1.0) | 0.66       | 2,528 (19.7%) | 2,599 (20.2%) | 1.0 (0.9-1.0) | 0.27   |
|                                        | Anxiety Disorders       | 2,589 (19.7%) | 2,395 (18.3%) | 1.1 (1.0-1.2) | 0.002      | 2,485 (19.4%) | 2,320 (18.1%) | 1.1 (1.0-1.2) | 0.008  |
|                                        | HTN                     | 8,623 (65.7%) | 8,568 (65.3%) | 1.0 (1.0-1.1) | 0.47       | 8,371 (65.2%) | 8,425 (65.6%) | 1.0 (0.9-1.0) | 0.48   |
|                                        | GERD                    | 3,573 (27.2%) | 3,906 (29.8%) | 0.9 (0.8-0.9) | <0.001     | 3,515 (27.4%) | 3,823 (29.8%) | 0.9 (0.8-0.9) | <0.001 |
|                                        | Malaise/Fatigue         | 2,986 (22.8%) | 3,286 (25.0%) | 0.9 (0.8-0.9) | <0.001     | 2,859 (22.3%) | 3,208 (25.0%) | 0.9 (0.8-0.9) | <0.001 |
|                                        | Joint Pain/Myalgias     | 4,968 (37.9%) | 5,076 (38.7%) | 1.0 (0.9-1.0) | 0.17       | 4,771 (37.2%) | 4,966 (38.7%) | 0.9 (0.9-1.0) | 0.01   |
|                                        | Constipation            | 1,801 (13.7%) | 1,922 (14.7%) | 0.9 (0.9-1.0) | 0.03       | 1,779 (13.9%) | 1,887 (14.7%) | 0.9 (0.9-1.0) | 0.05   |
|                                        | Insomnia                | 1,320 (10.1%) | 1,150 (8.8%)  | 1.2 (1.1-1.3) | <0.001     | 1,236 (9.6%)  | 1,116 (8.7%)  | 1.1 (1.0-1.2) | 0.009  |
|                                        | Polyuria                | 1,514 (11.5%) | 1,666 (12.7%) | 0.9 (0.8-1.0) | 0.004      | 1,432 (11.2%) | 1,634 (12.7%) | 0.9 (0.8-0.9) | <0.001 |
|                                        | Weakness                | 2,065 (15.7%) | 2,266 (17.3%) | 0.9 (0.8-1.0) | <0.001     | 1,954 (15.2%) | 2,212 (17.2%) | 0.9 (0.8-0.9) | <0.001 |
|                                        | Abdominal Pain          | 3,221 (24.6%) | 3,292 (25.1%) | 1.0 (0.9-1.0) | 0.31       | 3,075 (23.9%) | 3,203 (24.9%) | 0.9 (0.9-1.0) | 0.07   |
|                                        | Headache                | 1,822 (13.9%) | 1,789 (13.6%) | 1.0 (1.0-1.1) | 0.55       | 1,685 (13.1%) | 1,737 (13.5%) | 1.0 (0.9-1.0) | 0.34   |
|                                        | Nausea                  | 1,324 (10.1%) | 1,301 (9.9%)  | 1.0 (0.9-1.1) | 0.64       | 1,214 (9.5%)  | 1,262 (9.8%)  | 1.0 (0.9-1.0) | 0.31   |
|                                        | Amnesia                 | 1,170 (8.9%)  | 1,157 (8.8%)  | 1.0 (0.9-1.1) | 0.78       | 1,104 (8.6%)  | 1,140 (8.9%)  | 1.0 (0.9-1.1) | 0.43   |
| Gallstones                             | 567 (4.3%)              | 579 (4.4%)    | 1.0 (0.9-1.1) | 0.72          | 550 (4.3%) | 571 (4.4%)    | 1.0 (0.9-1.1) | 0.52          |        |

Abbreviations: PHP, primary hyperparathyroidism; PTH, parathyroid hormone; MDD, major depressive disorder; HTN, hypertension; GERD, gastroesophageal reflux disease; CI, confidence interval

<sup>a</sup>Statistical significance defined as  $P < 0.003$



**eTable 8:** Comparing Diagnoses and Symptoms in Patients at High Risk of PHP With Hypercalcemia and PTH  $\geq 65$  (n = 14,959) or 100 pg/mL (n = 7,387) Without a Documented Diagnosis With Those Diagnosed (n = 13,136)

|                  | Diagnosis               | High-Risk PHP PTH $\geq 65$ (n = 11,076 after matching) | Diagnosed (n = 11,076 after matching) | Odds Ratio (95% CI) | *P value   | High-Risk PHP PTH $\geq 100$ (n = 5,686 after matching) | Diagnosed (n = 5,686 after matching) | Odds Ratio (95% CI) | *P value |
|------------------|-------------------------|---------------------------------------------------------|---------------------------------------|---------------------|------------|---------------------------------------------------------|--------------------------------------|---------------------|----------|
| <b>0-1 Year</b>  | Osteopenia/Osteoporosis | 1,698 (15.3%)                                           | 2,464 (22.2%)                         | 0.6 (0.6-0.7)       | <0.001     | 809 (14.2%)                                             | 1,250 (22.0%)                        | 0.6 (0.5-0.6)       | <0.001   |
|                  | Fractures               | 434 (3.9%)                                              | 462 (4.2%)                            | 0.9 (0.8-1.1)       | 0.34       | 191 (3.4%)                                              | 242 (4.3%)                           | 0.8 (0.6-0.9)       | 0.01     |
|                  | Urolithiasis            | 496 (4.5%)                                              | 944 (8.5%)                            | 0.5 (0.4-0.6)       | <0.001     | 227 (4.0%)                                              | 445 (7.8%)                           | 0.5 (0.4-0.6)       | <0.001   |
|                  | MDD                     | 1,275 (11.5%)                                           | 1,353 (12.2%)                         | 0.9 (0.9-1.0)       | 0.11       | 569 (10.0%)                                             | 665 (11.7%)                          | 0.8 (0.7-0.9)       | 0.004    |
|                  | Anxiety Disorders       | 1,229 (11.1%)                                           | 1,159 (10.5%)                         | 1.1 (1.0-1.2)       | 0.13       | 547 (9.6%)                                              | 599 (10.5%)                          | 0.9 (0.8-1.0)       | 0.11     |
|                  | HTN                     | 5,854 (52.9%)                                           | 5,945 (53.7%)                         | 1.0 (0.9-1.0)       | 0.22       | 2,803 (49.3%)                                           | 3,100 (54.5%)                        | 0.8 (0.8-0.9)       | <0.001   |
|                  | GERD                    | 1,875 (16.9%)                                           | 2,049 (18.5%)                         | 0.9 (0.8-1.0)       | 0.002      | 860 (15.1%)                                             | 1,047 (18.4%)                        | 0.8 (0.7-0.9)       | <0.001   |
|                  | Malaise/Fatigue         | 1,302 (11.8%)                                           | 1,505 (13.6%)                         | 0.8 (0.8-0.9)       | <0.001     | 604 (10.6%)                                             | 774 (13.6%)                          | 0.8 (0.7-0.8)       | <0.001   |
|                  | Joint Pain/Myalgias     | 2,122 (19.2%)                                           | 2,352 (21.2%)                         | 0.9 (0.8-0.9)       | <0.001     | 1,009 (17.7%)                                           | 1,159 (20.4%)                        | 0.8 (0.8-0.9)       | <0.001   |
|                  | Constipation            | 776 (7.0%)                                              | 883 (8.0%)                            | 0.9 (0.8-1.0)       | 0.006      | 341 (6.0%)                                              | 468 (8.2%)                           | 0.7 (0.6-0.8)       | <0.001   |
|                  | Insomnia                | 531 (4.8%)                                              | 504 (4.6%)                            | 1.1 (0.9-1.2)       | 0.39       | 242 (4.3%)                                              | 267 (4.7%)                           | 0.9 (0.8-1.1)       | 0.26     |
|                  | Polyuria                | 542 (4.9%)                                              | 681 (6.1%)                            | 0.8 (0.7-0.9)       | <0.001     | 243 (4.3%)                                              | 347 (6.1%)                           | 0.7 (0.6-0.8)       | <0.001   |
|                  | Weakness                | 860 (7.8%)                                              | 1,040 (9.4%)                          | 0.8 (0.7-0.9)       | <0.001     | 394 (6.9%)                                              | 538 (9.5%)                           | 0.7 (0.6-0.8)       | <0.001   |
|                  | Abdominal Pain          | 1,302 (11.8%)                                           | 1,423 (12.8%)                         | 0.9 (0.8-1.0)       | 0.01       | 575 (10.1%)                                             | 702 (12.3%)                          | 0.8 (0.7-0.9)       | <0.001   |
| Headache         | 695 (6.3%)              | 769 (6.9%)                                              | 0.9 (0.8-1.0)                         | 0.05                | 299 (5.3%) | 388 (6.8%)                                              | 0.8 (0.6-0.9)                        | <0.001              |          |
| Nausea           | 512 (4.6%)              | 560 (5.1%)                                              | 0.9 (0.8-1.0)                         | 0.13                | 221 (3.9%) | 282 (5.0%)                                              | 0.8 (0.6-0.9)                        | 0.005               |          |
| Amnesia          | 480 (4.3%)              | 536 (4.8%)                                              | 0.9 (0.8-1.0)                         | 0.07                | 209 (3.7%) | 286 (5.0%)                                              | 0.7 (0.6-0.9)                        | <0.001              |          |
| Gallstones       | 239 (2.2%)              | 253 (2.3%)                                              | 0.9 (0.8-1.1)                         | 0.52                | 118 (2.1%) | 130 (2.3%)                                              | 0.9 (0.7-1.2)                        | 0.44                |          |
| <b>1-2 Years</b> | Osteopenia/Osteoporosis | 1,760 (15.9%)                                           | 2,462 (22.2%)                         | 0.7 (0.6-0.7)       | <0.001     | 827 (14.5%)                                             | 1,243 (21.9%)                        | 0.6 (0.6-0.7)       | <0.001   |
|                  | Fractures               | 377 (3.4%)                                              | 386 (3.5%)                            | 1.0 (0.8-1.1)       | 0.74       | 171 (3.0%)                                              | 185 (3.3%)                           | 0.9 (0.7-1.1)       | 0.45     |
|                  | Urolithiasis            | 431 (3.9%)                                              | 756 (6.8%)                            | 0.6 (0.5-0.6)       | <0.001     | 207 (3.6%)                                              | 366 (6.4%)                           | 0.5 (0.5-0.7)       | <0.001   |
|                  | MDD                     | 1,234 (11.1%)                                           | 1,262 (11.4%)                         | 1.0 (0.9-1.1)       | 0.55       | 555 (9.8%)                                              | 620 (10.9%)                          | 0.9 (0.8-1.0)       | 0.05     |
|                  | Anxiety Disorders       | 1,111 (10.0%)                                           | 1,055 (9.5%)                          | 1.1 (1.0-1.2)       | 0.21       | 505 (8.9%)                                              | 532 (9.4%)                           | 0.9 (0.8-1.1)       | 0.38     |
|                  | HTN                     | 5,727 (51.7%)                                           | 5,670 (51.2%)                         | 1.0 (1.0-1.1)       | 0.44       | 2,733 (48.1%)                                           | 2,913 (51.2%)                        | 0.9 (0.8-0.9)       | <0.001   |
|                  | GERD                    | 1,705 (15.4%)                                           | 1,897 (17.1%)                         | 0.9 (0.8-0.9)       | <0.001     | 756 (13.3%)                                             | 993 (17.5%)                          | 0.7 (0.7-0.8)       | <0.001   |
|                  | Malaise/Fatigue         | 961 (8.7%)                                              | 1,145 (10.3%)                         | 0.8 (0.8-0.9)       | <0.001     | 432 (7.6%)                                              | 566 (10.0%)                          | 0.7 (0.7-0.8)       | <0.001   |
|                  | Joint Pain/Myalgias     | 2,083 (18.8%)                                           | 2,166 (19.6%)                         | 1.0 (0.9-1.0)       | 0.16       | 985 (17.3%)                                             | 1,116 (19.6%)                        | 0.9 (0.8-0.9)       | 0.002    |
|                  | Constipation            | 643 (5.8%)                                              | 709 (6.4%)                            | 0.9 (0.8-1.0)       | 0.06       | 290 (5.1%)                                              | 370 (6.5%)                           | 0.8 (0.7-0.9)       | 0.001    |
|                  | Insomnia                | 447 (4.0%)                                              | 457 (4.1%)                            | 1.0 (0.9-1.1)       | 0.73       | 205 (3.6%)                                              | 243 (4.3%)                           | 0.8 (0.7-1.0)       | 0.07     |
|                  | Polyuria                | 497 (4.5%)                                              | 574 (5.2%)                            | 0.9 (0.8-1.0)       | 0.02       | 236 (4.2%)                                              | 285 (5.0%)                           | 0.8 (0.7-1.0)       | 0.03     |
|                  | Weakness                | 580 (5.2%)                                              | 776 (7.0%)                            | 0.7 (0.7-0.8)       | <0.001     | 271 (4.8%)                                              | 391 (6.9%)                           | 0.7 (0.6-0.8)       | <0.001   |
|                  | Abdominal Pain          | 1,062 (9.6%)                                            | 1,208 (10.9%)                         | 0.9 (0.8-0.9)       | 0.001      | 475 (8.4%)                                              | 632 (11.1%)                          | 0.7 (0.6-0.8)       | <0.001   |
|                  | Headache                | 587 (5.3%)                                              | 582 (5.3%)                            | 1.0 (0.9-1.1)       | 0.88       | 270 (4.7%)                                              | 296 (5.2%)                           | 0.9 (0.8-1.1)       | 0.26     |
|                  | Nausea                  | 372 (3.4%)                                              | 385 (3.5%)                            | 1.0 (0.8-1.1)       | 0.63       | 173 (3.0%)                                              | 200 (3.5%)                           | 0.9 (0.7-1.1)       | 0.16     |
|                  | Amnesia                 | 417 (3.8%)                                              | 429 (3.9%)                            | 1.0 (0.8-1.1)       | 0.67       | 190 (3.3%)                                              | 242 (4.3%)                           | 0.8 (0.6-0.9)       | 0.01     |
| Gallstones       | 170 (1.5%)              | 204 (1.8%)                                              | 0.8 (0.7-1.0)                         | 0.07                | 88 (1.5%)  | 118 (2.1%)                                              | 0.7 (0.6-1.0)                        | 0.03                |          |
| <b>2-3 Years</b> | Osteopenia/Osteoporosis | 1,888 (17.0%)                                           | 2,747 (24.8%)                         | 0.6 (0.6-0.7)       | <0.001     | 874 (15.4%)                                             | 1,396 (24.6%)                        | 0.6 (0.5-0.6)       | <0.001   |
|                  | Fractures               | 429 (3.9%)                                              | 427 (3.9%)                            | 1.0 (0.9-1.2)       | 0.94       | 182 (3.2%)                                              | 216 (3.8%)                           | 0.8 (0.7-1.0)       | 0.08     |
|                  | Urolithiasis            | 411 (3.7%)                                              | 767 (6.9%)                            | 0.5 (0.5-0.6)       | <0.001     | 195 (3.4%)                                              | 361 (6.3%)                           | 0.5 (0.4-0.6)       | <0.001   |
|                  | MDD                     | 1,307 (11.8%)                                           | 1,290 (11.6%)                         | 1.0 (0.9-1.1)       | 0.72       | 574 (10.1%)                                             | 639 (11.2%)                          | 0.9 (0.8-1.0)       | 0.05     |
|                  | Anxiety Disorders       | 1,182 (10.7%)                                           | 1,118 (10.1%)                         | 1.1 (1.0-1.2)       | 0.16       | 536 (9.4%)                                              | 556 (9.8%)                           | 1.0 (0.8-1.1)       | 0.52     |
|                  | HTN                     | 5,858 (52.9%)                                           | 5,780 (52.2%)                         | 1.0 (1.0-1.1)       | 0.29       | 2,813 (49.5%)                                           | 2,991 (52.6%)                        | 0.9 (0.8-0.9)       | <0.001   |
|                  | GERD                    | 1,741 (15.7%)                                           | 1,951 (17.6%)                         | 0.9 (0.8-0.9)       | <0.001     | 773 (13.6%)                                             | 1,009 (17.7%)                        | 0.7 (0.7-0.8)       | <0.001   |
|                  | Malaise/Fatigue         | 1,009 (9.1%)                                            | 1,174 (10.6%)                         | 0.8 (0.8-0.9)       | <0.001     | 484 (8.5%)                                              | 607 (10.7%)                          | 0.8 (0.7-0.9)       | <0.001   |
|                  | Joint Pain/Myalgias     | 2,099 (19.0%)                                           | 2,209 (19.9%)                         | 0.9 (0.9-1.0)       | 0.06       | 953 (16.8%)                                             | 1,150 (20.2%)                        | 0.8 (0.7-0.9)       | <0.001   |
|                  | Constipation            | 608 (5.5%)                                              | 684 (6.2%)                            | 0.9 (0.8-1.0)       | 0.03       | 271 (4.8%)                                              | 358 (6.3%)                           | 0.7 (0.6-0.9)       | <0.001   |
| Insomnia         | 473 (4.3%)              | 480 (4.3%)                                              | 1.0 (0.9-1.1)                         | 0.82                | 214 (3.8%) | 262 (4.6%)                                              | 0.8 (0.7-1.0)                        | 0.02                |          |

|                                        |                         |               |               |               |            |               |               |               |        |
|----------------------------------------|-------------------------|---------------|---------------|---------------|------------|---------------|---------------|---------------|--------|
|                                        | Polyuria                | 532 (4.8%)    | 584 (5.3%)    | 0.9 (0.8-1.0) | 0.11       | 230 (4.0%)    | 308 (5.4%)    | 0.7 (0.6-0.9) | <0.001 |
|                                        | Weakness                | 641 (5.8%)    | 721 (6.5%)    | 0.9 (0.8-1.0) | 0.03       | 293 (5.2%)    | 374 (6.6%)    | 0.8 (0.7-0.9) | 0.001  |
|                                        | Abdominal Pain          | 1,076 (9.7%)  | 1,147 (10.4%) | 0.9 (0.9-1.0) | 0.11       | 482 (8.5%)    | 573 (10.1%)   | 0.8 (0.7-0.9) | 0.003  |
|                                        | Headache                | 544 (4.9%)    | 593 (5.4%)    | 0.9 (0.8-1.0) | 0.14       | 248 (4.4%)    | 299 (5.3%)    | 0.8 (0.7-1.0) | 0.03   |
|                                        | Nausea                  | 364 (3.3%)    | 384 (3.5%)    | 0.9 (0.8-1.1) | 0.46       | 152 (2.7%)    | 205 (3.6%)    | 0.7 (0.6-0.9) | 0.004  |
|                                        | Amnesia                 | 419 (3.8%)    | 440 (4.0%)    | 1.0 (0.8-1.1) | 0.46       | 170 (3.0%)    | 242 (4.3%)    | 0.7 (0.6-0.8) | <0.001 |
|                                        | Gallstones              | 174 (1.6%)    | 188 (1.7%)    | 0.9 (0.8-1.1) | 0.46       | 78 (1.4%)     | 105 (1.8%)    | 0.7 (0.6-1.0) | 0.04   |
| <b>Entire Study Period (0-3 Years)</b> | Osteopenia/Osteoporosis | 2,893 (26.1%) | 4,201 (37.9%) | 0.6 (0.5-0.6) | <0.001     | 1,399 (24.6%) | 2,132 (37.5%) | 0.5 (0.5-0.6) | <0.001 |
|                                        | Fractures               | 903 (8.2%)    | 938 (8.5%)    | 1.0 (0.9-1.1) | 0.39       | 400 (7.0%)    | 471 (8.3%)    | 0.8 (0.7-1.0) | 0.01   |
|                                        | Urolithiasis            | 827 (7.5%)    | 1,556 (14.0%) | 0.5 (0.5-0.5) | <0.001     | 401 (7.1%)    | 756 (13.3%)   | 0.5 (0.4-0.6) | <0.001 |
|                                        | MDD                     | 2,058 (18.6%) | 2,210 (20.0%) | 0.9 (0.9-1.0) | 0.01       | 898 (15.8%)   | 1,097 (19.3%) | 0.8 (0.7-0.9) | <0.001 |
|                                        | Anxiety Disorders       | 2,005 (18.1%) | 1,981 (17.9%) | 1.0 (0.9-1.1) | 0.67       | 923 (16.2%)   | 1,012 (17.8%) | 0.9 (0.8-1.0) | 0.03   |
|                                        | HTN                     | 7,215 (65.1%) | 7,378 (66.6%) | 0.9 (0.9-1.0) | 0.02       | 3,528 (62.0%) | 3,826 (67.3%) | 0.8 (0.7-0.9) | <0.001 |
|                                        | GERD                    | 2,933 (26.5%) | 3,286 (29.7%) | 0.9 (0.8-0.9) | <0.001     | 1,370 (24.1%) | 1,704 (30.0%) | 0.7 (0.7-0.8) | <0.001 |
|                                        | Malaise/Fatigue         | 2,337 (21.1%) | 2,778 (25.1%) | 0.8 (0.8-0.9) | <0.001     | 1,088 (19.1%) | 1,408 (24.8%) | 0.7 (0.7-0.8) | <0.001 |
|                                        | Joint Pain/Myalgias     | 3,931 (35.5%) | 4,274 (38.6%) | 0.9 (0.8-0.9) | <0.001     | 1,882 (33.1%) | 2,149 (37.8%) | 0.8 (0.8-0.9) | <0.001 |
|                                        | Constipation            | 1,459 (13.2%) | 1,669 (15.1%) | 0.9 (0.8-0.9) | <0.001     | 661 (11.6%)   | 883 (15.5%)   | 0.7 (0.6-0.8) | <0.001 |
|                                        | Insomnia                | 974 (8.8%)    | 969 (8.7%)    | 1.0 (0.9-1.1) | 0.91       | 445 (7.8%)    | 519 (9.1%)    | 0.8 (0.7-1.0) | 0.01   |
|                                        | Polyuria                | 1,203 (10.9%) | 1,448 (13.1%) | 0.8 (0.7-0.9) | <0.001     | 539 (9.5%)    | 742 (13.0%)   | 0.7 (0.6-0.8) | <0.001 |
|                                        | Weakness                | 1,573 (14.2%) | 1,926 (17.4%) | 0.8 (0.7-0.8) | <0.001     | 736 (12.9%)   | 981 (17.3%)   | 0.7 (0.6-0.8) | <0.001 |
|                                        | Abdominal Pain          | 2,503 (22.6%) | 2,754 (24.9%) | 0.9 (0.8-0.9) | <0.001     | 1,131 (19.9%) | 1,398 (24.6%) | 0.8 (0.7-0.8) | <0.001 |
|                                        | Headache                | 1,387 (12.5%) | 1,478 (13.3%) | 0.9 (0.9-1.0) | 0.07       | 619 (10.9%)   | 740 (13.0%)   | 0.8 (0.7-0.9) | <0.001 |
|                                        | Nausea                  | 955 (8.6%)    | 1,064 (9.6%)  | 0.9 (0.8-1.0) | 0.01       | 432 (7.6%)    | 549 (9.7%)    | 0.8 (0.7-0.9) | <0.001 |
|                                        | Amnesia                 | 946 (8.5%)    | 1,008 (9.1%)  | 0.9 (0.8-1.0) | 0.14       | 420 (7.4%)    | 547 (9.6%)    | 0.7 (0.7-0.9) | <0.001 |
| Gallstones                             | 455 (4.1%)              | 487 (4.4%)    | 0.9 (0.8-1.1) | 0.29          | 225 (4.0%) | 266 (4.7%)    | 0.8 (0.7-1.0) | 0.06          |        |

Abbreviations: PHP, primary hyperparathyroidism; PTH, parathyroid hormone; MDD, major depressive disorder; HTN, hypertension; GERD, gastroesophageal reflux disease; CI, confidence interval

<sup>a</sup>Statistical significance defined as  $P < 0.003$

**eTable 9:** Comparing Diagnoses and Symptoms in Patients at High Risk of PHP With Hypercalcemia and PTH  $\geq 40$  (n = 23,969) or 50 pg/mL (n = 20,176) Without a Documented Diagnosis With Those Diagnosed With Similar PTH Levels (n = 12,294 for PTH  $\geq 40$  and n = 11,968 for  $\geq 50$  pg/mL)

|                     | Diagnosis               | High-Risk PHP PTH $\geq 40$ (n = 12,277 after matching) | Diagnosed PTH $\geq 40$ (n = 12,277 after matching) | Odds Ratio (95% CI) | <sup>a</sup> P value | High-Risk PHP PTH $\geq 50$ (n = 11,876 after matching) | Diagnosed PTH $\geq 50$ (n = 11,876 after matching) | Odds Ratio (95% CI) | <sup>a</sup> P value |
|---------------------|-------------------------|---------------------------------------------------------|-----------------------------------------------------|---------------------|----------------------|---------------------------------------------------------|-----------------------------------------------------|---------------------|----------------------|
| <b>0-1 Year</b>     | Osteopenia/Osteoporosis | 1,900 (15.5%)                                           | 2,677 (21.8%)                                       | 0.7 (0.6-0.7)       | <0.001               | 1,826 (15.4%)                                           | 2,589 (21.8%)                                       | 0.7 (0.6-0.7)       | <0.001               |
|                     | Fractures               | 515 (4.2%)                                              | 509 (4.1%)                                          | 1.0 (0.9-1.1)       | 0.85                 | 511 (4.3%)                                              | 492 (4.1%)                                          | 1.0 (0.9-1.2)       | 0.54                 |
|                     | Urolithiasis            | 621 (5.1%)                                              | 1,099 (9.0%)                                        | 0.5 (0.5-0.6)       | <0.001               | 576 (4.9%)                                              | 1,043 (8.8%)                                        | 0.5 (0.5-0.6)       | <0.001               |
|                     | MDD                     | 1,567 (12.8%)                                           | 1,560 (12.7%)                                       | 1.0 (0.9-1.1)       | 0.89                 | 1,481 (12.5%)                                           | 1,510 (12.7%)                                       | 1.0 (0.9-1.1)       | 0.57                 |
|                     | Anxiety Disorders       | 1,501 (12.2%)                                           | 1,328 (10.8%)                                       | 1.1 (1.1-1.2)       | <0.001               | 1,453 (12.2%)                                           | 1,273 (10.7%)                                       | 1.2 (1.1-1.3)       | <0.001               |
|                     | HTN                     | 6,607 (53.8%)                                           | 6,357 (51.8%)                                       | 1.1 (1.0-1.1)       | 0.001                | 6,272 (52.8%)                                           | 6,153 (51.8%)                                       | 1.0 (1.0-1.1)       | 0.12                 |
|                     | GERD                    | 2,167 (17.7%)                                           | 2,259 (18.4%)                                       | 1.0 (0.9-1.0)       | 0.13                 | 2,082 (17.5%)                                           | 2,185 (18.4%)                                       | 0.9 (0.9-1.0)       | 0.08                 |
|                     | Malaise/Fatigue         | 1,566 (12.8%)                                           | 1,673 (13.6%)                                       | 0.9 (0.9-1.0)       | 0.04                 | 1,484 (12.5%)                                           | 1,581 (13.3%)                                       | 0.9 (0.9-1.0)       | 0.06                 |
|                     | Joint Pain/Myalgias     | 2,617 (21.3%)                                           | 2,592 (21.1%)                                       | 1.0 (1.0-1.1)       | 0.70                 | 2,442 (20.6%)                                           | 2,509 (21.1%)                                       | 1.0 (0.9-1.0)       | 0.28                 |
|                     | Constipation            | 915 (7.5%)                                              | 958 (7.8%)                                          | 1.0 (0.9-1.0)       | 0.30                 | 879 (7.4%)                                              | 919 (7.7%)                                          | 1.0 (0.9-1.0)       | 0.33                 |
|                     | Insomnia                | 705 (5.7%)                                              | 562 (4.6%)                                          | 1.3 (1.1-1.4)       | <0.001               | 651 (5.5%)                                              | 544 (4.6%)                                          | 1.2 (1.1-1.4)       | 0.001                |
|                     | Polyuria                | 659 (5.4%)                                              | 740 (6.0%)                                          | 0.9 (0.8-1.0)       | 0.03                 | 581 (4.9%)                                              | 714 (6.0%)                                          | 0.8 (0.7-0.9)       | <0.001               |
|                     | Weakness                | 1,072 (8.7%)                                            | 1,146 (9.3%)                                        | 0.9 (0.9-1.0)       | 0.10                 | 990 (8.3%)                                              | 1,090 (9.2%)                                        | 0.9 (0.8-1.0)       | 0.02                 |
|                     | Abdominal Pain          | 1,668 (13.6%)                                           | 1,601 (13.0%)                                       | 1.0 (1.0-1.1)       | 0.21                 | 1,568 (13.2%)                                           | 1,541 (13.0%)                                       | 1.0 (0.9-1.1)       | 0.60                 |
|                     | Headache                | 866 (7.1%)                                              | 859 (7.0%)                                          | 1.0 (0.9-1.1)       | 0.86                 | 798 (6.7%)                                              | 823 (6.9%)                                          | 1.0 (0.9-1.1)       | 0.52                 |
|                     | Nausea                  | 690 (5.6%)                                              | 640 (5.2%)                                          | 1.1 (1.0-1.2)       | 0.16                 | 628 (5.3%)                                              | 604 (5.1%)                                          | 1.0 (0.9-1.2)       | 0.48                 |
|                     | Amnesia                 | 544 (4.4%)                                              | 572 (4.7%)                                          | 0.9 (0.8-1.1)       | 0.39                 | 503 (4.2%)                                              | 549 (4.6%)                                          | 0.9 (0.8-1.0)       | 0.15                 |
| Gallstones          | 274 (2.2%)              | 291 (2.4%)                                              | 0.9 (0.8-1.1)                                       | 0.47                | 275 (2.3%)           | 281 (2.4%)                                              | 1.0 (0.8-1.2)                                       | 0.80                |                      |
| <b>1-2 Years</b>    | Osteopenia/Osteoporosis | 1,975 (16.1%)                                           | 2,665 (21.7%)                                       | 0.7 (0.6-0.7)       | <0.001               | 1,903 (16.0%)                                           | 2,586 (21.8%)                                       | 0.7 (0.6-0.7)       | <0.001               |
|                     | Fractures               | 482 (3.9%)                                              | 431 (3.5%)                                          | 1.1 (1.0-1.3)       | 0.09                 | 446 (3.8%)                                              | 412 (3.5%)                                          | 1.1 (0.9-1.2)       | 0.24                 |
|                     | Urolithiasis            | 529 (4.3%)                                              | 875 (7.1%)                                          | 0.6 (0.5-0.7)       | <0.001               | 473 (4.0%)                                              | 831 (7.0%)                                          | 0.6 (0.5-0.6)       | <0.001               |
|                     | MDD                     | 1,462 (11.9%)                                           | 1,440 (11.7%)                                       | 1.0 (0.9-1.1)       | 0.66                 | 1,404 (11.8%)                                           | 1,391 (11.7%)                                       | 1.0 (0.9-1.1)       | 0.79                 |
|                     | Anxiety Disorders       | 1,384 (11.3%)                                           | 1,208 (9.8%)                                        | 1.2 (1.1-1.3)       | <0.001               | 1,296 (10.9%)                                           | 1,160 (9.8%)                                        | 1.1 (1.0-1.2)       | 0.004                |
|                     | HTN                     | 6,483 (52.8%)                                           | 6,082 (49.5%)                                       | 1.1 (1.1-1.2)       | <0.001               | 6,178 (52.0%)                                           | 5,890 (49.6%)                                       | 1.1 (1.0-1.2)       | <0.001               |
|                     | GERD                    | 1,987 (16.2%)                                           | 2,125 (17.3%)                                       | 0.9 (0.9-1.0)       | 0.02                 | 1,902 (16.0%)                                           | 2,056 (17.3%)                                       | 0.9 (0.9-1.0)       | 0.007                |
|                     | Malaise/Fatigue         | 1,180 (9.6%)                                            | 1,264 (10.3%)                                       | 0.9 (0.9-1.0)       | 0.07                 | 1,124 (9.5%)                                            | 1,204 (10.1%)                                       | 0.9 (0.9-1.0)       | 0.08                 |
|                     | Joint Pain/Myalgias     | 2,471 (20.1%)                                           | 2,418 (19.7%)                                       | 1.0 (1.0-1.1)       | 0.40                 | 2,368 (19.9%)                                           | 2,326 (19.6%)                                       | 1.0 (1.0-1.1)       | 0.49                 |
|                     | Constipation            | 710 (5.8%)                                              | 771 (6.3%)                                          | 0.9 (0.8-1.0)       | 0.10                 | 684 (5.8%)                                              | 744 (6.3%)                                          | 0.9 (0.8-1.0)       | 0.10                 |
|                     | Insomnia                | 582 (4.7%)                                              | 504 (4.1%)                                          | 1.2 (1.0-1.3)       | 0.02                 | 523 (4.4%)                                              | 486 (4.1%)                                          | 1.1 (1.0-1.2)       | 0.23                 |
|                     | Polyuria                | 556 (4.5%)                                              | 612 (5.0%)                                          | 0.9 (0.8-1.0)       | 0.09                 | 528 (4.4%)                                              | 588 (5.0%)                                          | 0.9 (0.8-1.0)       | 0.07                 |
|                     | Weakness                | 742 (6.0%)                                              | 841 (6.9%)                                          | 0.9 (0.8-1.0)       | 0.01                 | 686 (5.8%)                                              | 799 (6.7%)                                          | 0.8 (0.8-0.9)       | 0.002                |
|                     | Abdominal Pain          | 1,286 (10.5%)                                           | 1,328 (10.8%)                                       | 1.0 (0.9-1.0)       | 0.38                 | 1,204 (10.1%)                                           | 1,280 (10.8%)                                       | 0.9 (0.9-1.0)       | 0.11                 |
|                     | Headache                | 734 (6.0%)                                              | 650 (5.3%)                                          | 1.1 (1.0-1.3)       | 0.02                 | 665 (5.6%)                                              | 616 (5.2%)                                          | 1.1 (1.0-1.2)       | 0.16                 |
|                     | Nausea                  | 485 (4.0%)                                              | 437 (3.6%)                                          | 1.1 (1.0-1.3)       | 0.11                 | 441 (3.7%)                                              | 418 (3.5%)                                          | 1.1 (0.9-1.2)       | 0.42                 |
|                     | Amnesia                 | 470 (3.8%)                                              | 450 (3.7%)                                          | 1.0 (0.9-1.2)       | 0.50                 | 419 (3.5%)                                              | 433 (3.6%)                                          | 1.0 (0.8-1.1)       | 0.63                 |
| Gallstones          | 197 (1.6%)              | 225 (1.8%)                                              | 0.9 (0.7-1.1)                                       | 0.17                | 182 (1.5%)           | 219 (1.8%)                                              | 0.8 (0.7-1.0)                                       | 0.06                |                      |
| <b>2-3 Years</b>    | Osteopenia/Osteoporosis | 2,107 (17.2%)                                           | 2,992 (24.4%)                                       | 0.6 (0.6-0.7)       | <0.001               | 2,039 (17.2%)                                           | 2,898 (24.4%)                                       | 0.6 (0.6-0.7)       | <0.001               |
|                     | Fractures               | 519 (4.2%)                                              | 460 (3.7%)                                          | 1.1 (1.0-1.3)       | 0.05                 | 475 (4.0%)                                              | 444 (3.7%)                                          | 1.1 (0.9-1.2)       | 0.30                 |
|                     | Urolithiasis            | 527 (4.3%)                                              | 872 (7.1%)                                          | 0.6 (0.5-0.7)       | <0.001               | 474 (4.0%)                                              | 833 (7.0%)                                          | 0.6 (0.5-0.6)       | <0.001               |
|                     | MDD                     | 1,545 (12.6%)                                           | 1,477 (12.0%)                                       | 1.1 (1.0-1.1)       | 0.19                 | 1,479 (12.5%)                                           | 1,431 (12.0%)                                       | 1.0 (1.0-1.1)       | 0.34                 |
|                     | Anxiety Disorders       | 1,426 (11.6%)                                           | 1,290 (10.5%)                                       | 1.1 (1.0-1.2)       | 0.006                | 1,368 (11.5%)                                           | 1,243 (10.5%)                                       | 1.1 (1.0-1.2)       | 0.01                 |
|                     | HTN                     | 6,581 (53.6%)                                           | 6,189 (50.4%)                                       | 1.1 (1.1-1.2)       | <0.001               | 6,271 (52.8%)                                           | 5,991 (50.4%)                                       | 1.1 (1.0-1.2)       | <0.001               |
|                     | GERD                    | 2,026 (16.5%)                                           | 2,169 (17.7%)                                       | 0.9 (0.9-1.0)       | 0.02                 | 1,978 (16.7%)                                           | 2,090 (17.6%)                                       | 0.9 (0.9-1.0)       | 0.05                 |
|                     | Malaise/Fatigue         | 1,191 (9.7%)                                            | 1,299 (10.6%)                                       | 0.9 (0.8-1.0)       | 0.02                 | 1,151 (9.7%)                                            | 1,246 (10.5%)                                       | 0.9 (0.8-1.0)       | 0.04                 |
| Joint Pain/Myalgias | 2,467 (20.1%)           | 2,458 (20.0%)                                           | 1.0 (0.9-1.1)                                       | 0.89                | 2,327 (19.6%)        | 2,373 (20.0%)                                           | 1.0 (0.9-1.0)                                       | 0.45                |                      |

|                                        |                         |               |               |               |        |               |               |               |        |
|----------------------------------------|-------------------------|---------------|---------------|---------------|--------|---------------|---------------|---------------|--------|
|                                        | Constipation            | 727 (5.9%)    | 734 (6.0%)    | 1.0 (0.9-1.1) | 0.85   | 712 (6.0%)    | 712 (6.0%)    | 1.0 (0.9-1.1) | 1.0    |
|                                        | Insomnia                | 598 (4.9%)    | 531 (4.3%)    | 1.1 (1.0-1.3) | 0.04   | 560 (4.7%)    | 514 (4.3%)    | 1.1 (1.0-1.2) | 0.15   |
|                                        | Polyuria                | 607 (4.9%)    | 623 (5.1%)    | 1.0 (0.9-1.1) | 0.64   | 576 (4.9%)    | 600 (5.1%)    | 1.0 (0.9-1.1) | 0.47   |
|                                        | Weakness                | 792 (6.5%)    | 796 (6.5%)    | 1.0 (0.9-1.1) | 0.92   | 750 (6.3%)    | 756 (6.4%)    | 1.0 (0.9-1.1) | 0.87   |
|                                        | Abdominal Pain          | 1,313 (10.7%) | 1,277 (10.4%) | 1.0 (1.0-1.1) | 0.45   | 1,240 (10.4%) | 1,229 (10.3%) | 1.0 (0.9-1.1) | 0.82   |
|                                        | Headache                | 697 (5.7%)    | 670 (5.5%)    | 1.0 (0.9-1.2) | 0.45   | 621 (5.2%)    | 645 (5.4%)    | 1.0 (0.9-1.1) | 0.49   |
|                                        | Nausea                  | 474 (3.9%)    | 445 (3.6%)    | 1.1 (0.9-1.2) | 0.33   | 424 (3.6%)    | 427 (3.6%)    | 1.0 (0.9-1.1) | 0.92   |
|                                        | Amnesia                 | 480 (3.9%)    | 471 (3.8%)    | 1.0 (0.9-1.2) | 0.77   | 456 (3.8%)    | 455 (3.8%)    | 1.0 (0.9-1.1) | 0.97   |
|                                        | Gallstones              | 213 (1.7%)    | 215 (1.8%)    | 1.0 (0.8-1.2) | 0.92   | 198 (1.7%)    | 210 (1.8%)    | 0.9 (0.8-1.1) | 0.54   |
| <b>Entire Study Period (0-3 Years)</b> | Osteopenia/Osteoporosis | 3,159 (25.7%) | 4,584 (37.3%) | 0.6 (0.6-0.6) | <0.001 | 3,064 (25.8%) | 4,438 (37.4%) | 0.6 (0.6-0.6) | <0.001 |
|                                        | Fractures               | 1,073 (8.7%)  | 1,032 (8.4%)  | 1.0 (1.0-1.1) | 0.35   | 1,017 (8.6%)  | 997 (8.4%)    | 1.0 (0.9-1.1) | 0.64   |
|                                        | Urolithiasis            | 1,021 (8.3%)  | 1,787 (14.6%) | 0.5 (0.5-0.6) | <0.001 | 925 (7.8%)    | 1,710 (14.4%) | 0.5 (0.5-0.5) | <0.001 |
|                                        | MDD                     | 2,469 (20.1%) | 2,520 (20.5%) | 1.0 (0.9-1.0) | 0.42   | 2,357 (19.8%) | 2,438 (20.5%) | 1.0 (0.9-1.0) | 0.19   |
|                                        | Anxiety Disorders       | 2,447 (19.9%) | 2,256 (18.4%) | 1.1 (1.0-1.2) | 0.002  | 2,332 (19.6%) | 2,172 (18.3%) | 1.1 (1.0-1.2) | 0.008  |
|                                        | HTN                     | 8,052 (65.6%) | 7,983 (65.0%) | 1.0 (1.0-1.1) | 0.35   | 7,732 (65.1%) | 7,734 (65.1%) | 1.0 (0.9-1.1) | 0.98   |
|                                        | GERD                    | 3,355 (27.3%) | 3,670 (29.9%) | 0.9 (0.8-0.9) | <0.001 | 3,258 (27.4%) | 3,549 (29.9%) | 0.9 (0.8-0.9) | <0.001 |
|                                        | Malaise/Fatigue         | 2,791 (22.7%) | 3,087 (25.1%) | 0.9 (0.8-0.9) | <0.001 | 2,655 (22.4%) | 2,957 (24.9%) | 0.9 (0.8-0.9) | <0.001 |
|                                        | Joint Pain/Myalgias     | 4,660 (38.0%) | 4,733 (38.6%) | 1.0 (0.9-1.0) | 0.34   | 4,437 (37.4%) | 4,562 (38.4%) | 1.0 (0.9-1.0) | 0.09   |
|                                        | Constipation            | 1,688 (13.7%) | 1,804 (14.7%) | 0.9 (0.9-1.0) | 0.03   | 1,641 (13.8%) | 1,739 (14.6%) | 0.9 (0.9-1.0) | 0.07   |
|                                        | Insomnia                | 1,241 (10.1%) | 1,068 (8.7%)  | 1.2 (1.1-1.3) | <0.001 | 1,154 (9.7%)  | 1,030 (8.7%)  | 1.1 (1.0-1.2) | 0.005  |
|                                        | Polyuria                | 1,408 (11.5%) | 1,559 (12.7%) | 0.9 (0.8-1.0) | 0.003  | 1,306 (11.0%) | 1,505 (12.7%) | 0.9 (0.8-0.9) | <0.001 |
|                                        | Weakness                | 1,935 (15.8%) | 2,113 (17.2%) | 0.9 (0.8-1.0) | 0.002  | 1,823 (15.4%) | 2,032 (17.1%) | 0.9 (0.8-0.9) | <0.001 |
|                                        | Abdominal Pain          | 3,021 (24.6%) | 3,078 (25.1%) | 1.0 (0.9-1.0) | 0.40   | 2,865 (24.1%) | 2,963 (24.9%) | 1.0 (0.9-1.0) | 0.14   |
|                                        | Headache                | 1,694 (13.8%) | 1,655 (13.5%) | 1.0 (1.0-1.1) | 0.47   | 1,577 (13.3%) | 1,592 (13.4%) | 1.0 (0.9-1.1) | 0.77   |
|                                        | Nausea                  | 1,234 (10.1%) | 1,216 (9.9%)  | 1.0 (0.9-1.1) | 0.70   | 1,135 (9.6%)  | 1,163 (9.8%)  | 1.0 (0.9-1.1) | 0.54   |
|                                        | Amnesia                 | 1,099 (9.0%)  | 1,081 (8.8%)  | 1.0 (0.9-1.1) | 0.69   | 1,010 (8.5%)  | 1,046 (8.8%)  | 1.0 (0.9-1.1) | 0.41   |
|                                        | Gallstones              | 535 (4.4%)    | 550 (4.5%)    | 1.0 (0.9-1.1) | 0.64   | 511 (4.3%)    | 534 (4.5%)    | 1.0 (0.8-1.1) | 0.47   |

Abbreviations: PHP, primary hyperparathyroidism; PTH, parathyroid hormone; MDD, major depressive disorder; HTN, hypertension; GERD, gastroesophageal reflux disease; CI, confidence interval

\*Statistical significance defined as  $P < 0.003$

**eTable 10:** Comparing Diagnoses and Symptoms in Patients at High Risk of PHP With Hypercalcemia and PTH  $\geq 65$  (n = 14,959) or 100 pg/mL (n = 7,387) Without a Documented Diagnosis With Those Diagnosed With Similar PTH Levels (n = 11,262 for PTH  $\geq 65$  and n = 8,192 for  $\geq 100$  pg/mL)

|                  | Diagnosis               | High-Risk PHP PTH $\geq 65$<br>(n = 10,336 after matching) | Diagnosed PTH $\geq 65$<br>(n = 10,336 after matching) | Odds Ratio (95% CI) | <sup>a</sup> P value | High-Risk PHP PTH $\geq 100$<br>(n = 5,578 after matching) | Diagnosed PTH $\geq 100$<br>(n = 5,578 after matching) | Odds Ratio (95% CI) | <sup>a</sup> P value |
|------------------|-------------------------|------------------------------------------------------------|--------------------------------------------------------|---------------------|----------------------|------------------------------------------------------------|--------------------------------------------------------|---------------------|----------------------|
| <b>0-1 Year</b>  | Osteopenia/Osteoporosis | 1,565 (15.1%)                                              | 2,303 (22.3%)                                          | 0.6 (0.6-0.7)       | <0.001               | 799 (14.3%)                                                | 1,256 (22.5%)                                          | 0.6 (0.5-0.6)       | <0.001               |
|                  | Fractures               | 400 (3.9%)                                                 | 421 (4.1%)                                             | 0.9 (0.8-1.1)       | 0.45                 | 190 (3.4%)                                                 | 223 (4.0%)                                             | 0.8 (0.7-1.0)       | 0.10                 |
|                  | Urolithiasis            | 476 (4.6%)                                                 | 872 (8.4%)                                             | 0.5 (0.5-0.6)       | <0.001               | 226 (4.1%)                                                 | 453 (8.1%)                                             | 0.5 (0.4-0.6)       | <0.001               |
|                  | MDD                     | 1,227 (11.9%)                                              | 1,283 (12.4%)                                          | 1.0 (0.9-1.0)       | 0.23                 | 562 (10.1%)                                                | 641 (11.5%)                                            | 0.9 (0.8-1.0)       | 0.02                 |
|                  | Anxiety Disorders       | 1,159 (11.2%)                                              | 1,093 (10.6%)                                          | 1.1 (1.0-1.2)       | 0.14                 | 543 (9.7%)                                                 | 553 (9.9%)                                             | 1.0 (0.9-1.1)       | 0.75                 |
|                  | HTN                     | 5,433 (52.6%)                                              | 5,430 (52.5%)                                          | 1.0 (0.9-1.1)       | 0.97                 | 2,769 (49.6%)                                              | 2,995 (53.7%)                                          | 0.9 (0.8-0.9)       | <0.001               |
|                  | GERD                    | 1,752 (17.0%)                                              | 1,900 (18.4%)                                          | 0.9 (0.8-1.0)       | 0.007                | 852 (15.3%)                                                | 1,007 (18.1%)                                          | 0.8 (0.7-0.9)       | <0.001               |
|                  | Malaise/Fatigue         | 1,232 (11.9%)                                              | 1,366 (13.2%)                                          | 0.9 (0.8-1.0)       | 0.005                | 600 (10.8%)                                                | 723 (13.0%)                                            | 0.8 (0.7-0.9)       | <0.001               |
|                  | Joint Pain/Myalgias     | 1,974 (19.1%)                                              | 2,191 (21.2%)                                          | 0.9 (0.8-0.9)       | <0.001               | 1,001 (17.9%)                                              | 1,165 (20.9%)                                          | 0.8 (0.8-0.9)       | <0.001               |
|                  | Constipation            | 719 (7.0%)                                                 | 804 (7.8%)                                             | 0.9 (0.8-1.0)       | 0.02                 | 339 (6.1%)                                                 | 434 (7.8%)                                             | 0.8 (0.7-0.9)       | <0.001               |
|                  | Insomnia                | 514 (5.0%)                                                 | 456 (4.4%)                                             | 1.1 (1.0-1.3)       | 0.06                 | 239 (4.3%)                                                 | 247 (4.4%)                                             | 1.0 (0.8-1.2)       | 0.71                 |
|                  | Polyuria                | 504 (4.9%)                                                 | 628 (6.1%)                                             | 0.8 (0.7-0.9)       | <0.001               | 240 (4.3%)                                                 | 338 (6.1%)                                             | 0.7 (0.6-0.8)       | <0.001               |
|                  | Weakness                | 810 (7.8%)                                                 | 953 (9.2%)                                             | 0.8 (0.8-0.9)       | <0.001               | 392 (7.0%)                                                 | 501 (9.0%)                                             | 0.8 (0.7-0.9)       | <0.001               |
|                  | Abdominal Pain          | 1,227 (11.9%)                                              | 1,325 (12.8%)                                          | 0.9 (0.8-1.0)       | 0.04                 | 569 (10.2%)                                                | 700 (12.5%)                                            | 0.8 (0.7-0.9)       | <0.001               |
|                  | Headache                | 648 (6.3%)                                                 | 697 (6.7%)                                             | 0.9 (0.8-1.0)       | 0.17                 | 297 (5.3%)                                                 | 380 (6.8%)                                             | 0.8 (0.7-0.9)       | <0.001               |
|                  | Nausea                  | 476 (4.6%)                                                 | 505 (4.9%)                                             | 0.9 (0.8-1.1)       | 0.34                 | 221 (4.0%)                                                 | 262 (4.7%)                                             | 0.8 (0.7-1.0)       | 0.06                 |
|                  | Amnesia                 | 450 (4.4%)                                                 | 485 (4.7%)                                             | 0.9 (0.8-1.1)       | 0.24                 | 206 (3.7%)                                                 | 263 (4.7%)                                             | 0.8 (0.6-0.9)       | 0.007                |
| Gallstones       | 227 (2.2%)              | 246 (2.4%)                                                 | 0.9 (0.8-1.1)                                          | 0.38                | 115 (2.1%)           | 133 (2.4%)                                                 | 0.9 (0.7-1.1)                                          | 0.25                |                      |
| <b>1-2 Years</b> | Osteopenia/Osteoporosis | 1,622 (15.7%)                                              | 2,304 (22.3%)                                          | 0.6 (0.6-0.7)       | <0.001               | 812 (14.6%)                                                | 1,215 (21.8%)                                          | 0.6 (0.6-0.7)       | <0.001               |
|                  | Fractures               | 354 (3.4%)                                                 | 354 (3.4%)                                             | 1.0 (0.9-1.2)       | 1.0                  | 168 (3.0%)                                                 | 188 (3.4%)                                             | 0.9 (0.7-1.1)       | 0.28                 |
|                  | Urolithiasis            | 414 (4.0%)                                                 | 704 (6.8%)                                             | 0.6 (0.5-0.6)       | <0.001               | 206 (3.7%)                                                 | 360 (6.5%)                                             | 0.6 (0.5-0.7)       | <0.001               |
|                  | MDD                     | 1,183 (11.4%)                                              | 1,190 (11.5%)                                          | 1.0 (0.9-1.1)       | 0.88                 | 549 (9.8%)                                                 | 614 (11.0%)                                            | 0.9 (0.8-1.0)       | 0.04                 |
|                  | Anxiety Disorders       | 1,060 (10.3%)                                              | 999 (9.7%)                                             | 1.1 (1.0-1.2)       | 0.16                 | 503 (9.0%)                                                 | 512 (9.2%)                                             | 1.0 (0.9-1.1)       | 0.77                 |
|                  | HTN                     | 5,305 (51.3%)                                              | 5,185 (50.2%)                                          | 1.0 (1.0-1.1)       | 0.10                 | 2,696 (48.3%)                                              | 2,809 (50.4%)                                          | 0.9 (0.9-1.0)       | 0.03                 |
|                  | GERD                    | 1,605 (15.5%)                                              | 1,795 (17.4%)                                          | 0.9 (0.8-0.9)       | <0.001               | 746 (13.4%)                                                | 915 (16.4%)                                            | 0.8 (0.7-0.9)       | <0.001               |
|                  | Malaise/Fatigue         | 924 (8.9%)                                                 | 1,037 (10.0%)                                          | 0.9 (0.8-1.0)       | 0.007                | 428 (7.7%)                                                 | 529 (9.5%)                                             | 0.8 (0.7-0.9)       | <0.001               |
|                  | Joint Pain/Myalgias     | 1,959 (19.0%)                                              | 2,018 (19.5%)                                          | 1.0 (0.9-1.0)       | 0.30                 | 975 (17.5%)                                                | 1,091 (19.6%)                                          | 0.9 (0.8-1.0)       | 0.005                |
|                  | Constipation            | 602 (5.8%)                                                 | 653 (6.3%)                                             | 0.9 (0.8-1.0)       | 0.14                 | 286 (5.1%)                                                 | 336 (6.0%)                                             | 0.8 (0.7-1.0)       | 0.04                 |
|                  | Insomnia                | 435 (4.2%)                                                 | 420 (4.1%)                                             | 1.0 (0.9-1.2)       | 0.60                 | 201 (3.6%)                                                 | 231 (4.1%)                                             | 0.9 (0.7-1.0)       | 0.14                 |
|                  | Polyuria                | 457 (4.4%)                                                 | 522 (5.1%)                                             | 0.9 (0.8-1.0)       | 0.03                 | 231 (4.1%)                                                 | 244 (4.4%)                                             | 0.9 (0.8-1.1)       | 0.54                 |
|                  | Weakness                | 552 (5.3%)                                                 | 700 (6.8%)                                             | 0.8 (0.7-0.9)       | <0.001               | 268 (4.8%)                                                 | 336 (6.0%)                                             | 0.8 (0.7-0.9)       | 0.004                |

|                     |                                        |                         |               |               |               |               |               |               |               |        |
|---------------------|----------------------------------------|-------------------------|---------------|---------------|---------------|---------------|---------------|---------------|---------------|--------|
|                     | Abdominal Pain                         | 999 (9.7%)              | 1,097 (10.6%) | 0.9 (0.8-1.0) | 0.02          | 468 (8.4%)    | 568 (10.2%)   | 0.8 (0.7-0.9) | 0.001         |        |
|                     | Headache                               | 557 (5.4%)              | 520 (5.0%)    | 1.1 (1.0-1.2) | 0.25          | 267 (4.8%)    | 266 (4.8%)    | 1.0 (0.8-1.2) | 0.96          |        |
|                     | Nausea                                 | 353 (3.4%)              | 351 (3.4%)    | 1.0 (0.9-1.2) | 0.94          | 171 (3.1%)    | 179 (3.2%)    | 1.0 (0.8-1.2) | 0.66          |        |
|                     | Amnesia                                | 394 (3.8%)              | 376 (3.6%)    | 1.0 (0.9-1.2) | 0.51          | 188 (3.4%)    | 217 (3.9%)    | 0.9 (0.7-1.1) | 0.14          |        |
|                     | Gallstones                             | 160 (1.5%)              | 189 (1.8%)    | 0.8 (0.7-1.0) | 0.12          | 82 (1.5%)     | 99 (1.8%)     | 0.8 (0.6-1.1) | 0.20          |        |
| <b>2-3 Years</b>    | Osteopenia/Osteoporosis                | 1,748 (16.9%)           | 2,551 (24.7%) | 0.6 (0.6-0.7) | <0.001        | 862 (15.5%)   | 1,332 (23.9%) | 0.6 (0.5-0.6) | <0.001        |        |
|                     | Fractures                              | 395 (3.8%)              | 384 (3.7%)    | 1.0 (0.9-1.2) | 0.69          | 178 (3.2%)    | 193 (3.5%)    | 0.9 (0.7-1.1) | 0.43          |        |
|                     | Urolithiasis                           | 399 (3.9%)              | 712 (6.9%)    | 0.5 (0.5-0.6) | <0.001        | 192 (3.4%)    | 357 (6.4%)    | 0.5 (0.4-0.6) | <0.001        |        |
|                     | MDD                                    | 1,243 (12.0%)           | 1,228 (11.9%) | 1.0 (0.9-1.1) | 0.75          | 567 (10.2%)   | 630 (11.3%)   | 0.9 (0.8-1.0) | 0.05          |        |
|                     | Anxiety Disorders                      | 1,123 (10.9%)           | 1,068 (10.3%) | 1.1 (1.0-1.2) | 0.21          | 531 (9.5%)    | 513 (9.2%)    | 1.0 (0.9-1.2) | 0.56          |        |
|                     | HTN                                    | 5,427 (52.5%)           | 5,311 (51.4%) | 1.0 (1.0-1.1) | 0.11          | 2,774 (49.7%) | 2,883 (51.7%) | 0.9 (0.9-1.0) | 0.04          |        |
|                     | GERD                                   | 1,648 (15.9%)           | 1,835 (17.8%) | 0.9 (0.8-0.9) | <0.001        | 762 (13.7%)   | 947 (17.0%)   | 0.8 (0.7-0.9) | <0.001        |        |
|                     | Malaise/Fatigue                        | 952 (9.2%)              | 1,083 (10.5%) | 0.9 (0.8-0.9) | 0.002         | 478 (8.6%)    | 589 (10.6%)   | 0.8 (0.7-0.9) | <0.001        |        |
|                     | Joint Pain/Myalgias                    | 1,955 (18.9%)           | 2,077 (20.1%) | 0.9 (0.9-1.0) | 0.03          | 940 (16.9%)   | 1,094 (19.6%) | 0.8 (0.8-0.9) | <0.001        |        |
|                     | Constipation                           | 566 (5.5%)              | 613 (5.9%)    | 0.9 (0.8-1.0) | 0.16          | 266 (4.8%)    | 313 (5.6%)    | 0.8 (0.7-1.0) | 0.04          |        |
|                     | Insomnia                               | 451 (4.4%)              | 444 (4.3%)    | 1.0 (0.9-1.2) | 0.81          | 211 (3.8%)    | 223 (4.0%)    | 0.9 (0.8-1.1) | 0.56          |        |
|                     | Polyuria                               | 496 (4.8%)              | 538 (5.2%)    | 0.9 (0.8-1.0) | 0.18          | 229 (4.1%)    | 279 (5.0%)    | 0.8 (0.7-1.0) | 0.02          |        |
|                     | Weakness                               | 591 (5.7%)              | 671 (6.5%)    | 0.9 (0.8-1.0) | 0.02          | 290 (5.2%)    | 348 (6.2%)    | 0.8 (0.7-1.0) | 0.02          |        |
|                     | Abdominal Pain                         | 986 (9.5%)              | 1,070 (10.4%) | 0.9 (0.8-1.0) | 0.05          | 477 (8.6%)    | 565 (10.1%)   | 0.8 (0.7-0.9) | 0.004         |        |
|                     | Headache                               | 517 (5.0%)              | 556 (5.4%)    | 0.9 (0.8-1.0) | 0.22          | 245 (4.4%)    | 275 (4.9%)    | 0.9 (0.7-1.1) | 0.18          |        |
|                     | Nausea                                 | 337 (3.3%)              | 363 (3.5%)    | 0.9 (0.8-1.1) | 0.32          | 150 (2.7%)    | 171 (3.1%)    | 0.9 (0.7-1.1) | 0.23          |        |
|                     | Amnesia                                | 389 (3.8%)              | 405 (3.9%)    | 1.0 (0.8-1.1) | 0.56          | 169 (3.0%)    | 220 (3.9%)    | 0.8 (0.6-0.9) | 0.008         |        |
|                     | Gallstones                             | 166 (1.6%)              | 177 (1.7%)    | 0.9 (0.8-1.2) | 0.55          | 77 (1.4%)     | 90 (1.6%)     | 0.9 (0.6-1.2) | 0.31          |        |
|                     | <b>Entire Study Period (0-3 Years)</b> | Osteopenia/Osteoporosis | 2,673 (25.9%) | 3,911 (37.8%) | 0.6 (0.5-0.6) | <0.001        | 1,382 (24.8%) | 2,104 (37.7%) | 0.5 (0.5-0.6) | <0.001 |
|                     |                                        | Fractures               | 834 (8.1%)    | 876 (8.5%)    | 0.9 (0.9-1.0) | 0.29          | 393 (7.0%)    | 462 (8.3%)    | 0.8 (0.7-1.0) | 0.01   |
| Urolithiasis        |                                        | 795 (7.7%)              | 1,452 (14.0%) | 0.5 (0.5-0.6) | <0.001        | 398 (7.1%)    | 756 (13.6%)   | 0.5 (0.4-0.6) | <0.001        |        |
| MDD                 |                                        | 1,968 (19.0%)           | 2,082 (20.1%) | 0.9 (0.9-1.0) | 0.05          | 888 (15.9%)   | 1,098 (19.7%) | 0.8 (0.7-0.9) | <0.001        |        |
| Anxiety Disorders   |                                        | 1,895 (18.3%)           | 1,873 (18.1%) | 1.0 (0.9-1.1) | 0.69          | 916 (16.4%)   | 963 (17.3%)   | 0.9 (0.9-1.0) | 0.23          |        |
| HTN                 |                                        | 6,694 (64.8%)           | 6,809 (65.9%) | 1.0 (0.9-1.0) | 0.09          | 3,485 (62.5%) | 3,742 (67.1%) | 0.8 (0.8-0.9) | <0.001        |        |
| GERD                |                                        | 2,756 (26.7%)           | 3,102 (30.0%) | 0.8 (0.8-0.9) | <0.001        | 1,354 (24.3%) | 1,647 (29.5%) | 0.8 (0.7-0.8) | <0.001        |        |
| Malaise/Fatigue     |                                        | 2,210 (21.4%)           | 2,566 (24.8%) | 0.8 (0.8-0.9) | <0.001        | 1,079 (19.3%) | 1,377 (24.7%) | 0.7 (0.7-0.8) | <0.001        |        |
| Joint Pain/Myalgias |                                        | 3,670 (35.5%)           | 3,987 (38.6%) | 0.9 (0.8-0.9) | <0.001        | 1,860 (33.3%) | 2,132 (38.2%) | 0.8 (0.7-0.9) | <0.001        |        |
| Constipation        |                                        | 1,361 (13.2%)           | 1,522 (14.7%) | 0.9 (0.8-1.0) | 0.001         | 654 (11.7%)   | 805 (14.4%)   | 0.8 (0.7-0.9) | <0.001        |        |
| Insomnia            |                                        | 940 (9.1%)              | 888 (8.6%)    | 1.1 (1.0-1.2) | 0.20          | 439 (7.9%)    | 469 (8.4%)    | 0.9 (0.8-1.1) | 0.30          |        |
| Polyuria            |                                        | 1,124 (10.9%)           | 1,332 (12.9%) | 0.8 (0.8-0.9) | <0.001        | 531 (9.5%)    | 696 (12.5%)   | 0.7 (0.7-0.8) | <0.001        |        |
| Weakness            |                                        | 1,474 (14.3%)           | 1,779 (17.2%) | 0.8 (0.7-0.9) | <0.001        | 730 (13.1%)   | 933 (16.7%)   | 0.7 (0.7-0.8) | <0.001        |        |
| Abdominal Pain      |                                        | 2,334 (22.6%)           | 2,565 (24.8%) | 0.9 (0.8-0.9) | <0.001        | 1,118 (20.0%) | 1,352 (24.2%) | 0.8 (0.7-0.9) | <0.001        |        |

|  |            |                  |                  |                   |      |             |             |                   |       |
|--|------------|------------------|------------------|-------------------|------|-------------|-------------|-------------------|-------|
|  | Headache   | 1,303<br>(12.6%) | 1,357<br>(13.1%) | 1.0 (0.9-<br>1.0) | 0.26 | 612 (11.0%) | 714 (12.8%) | 0.8 (0.7-<br>0.9) | 0.003 |
|  | Nausea     | 889 (8.6%)       | 983 (9.5%)       | 0.9 (0.8-<br>1.0) | 0.02 | 429 (7.7%)  | 490 (8.8%)  | 0.9 (0.8-<br>1.0) | 0.04  |
|  | Amnesia    | 885 (8.6%)       | 922 (8.9%)       | 1.0 (0.9-<br>1.1) | 0.36 | 417 (7.5%)  | 508 (9.1%)  | 0.8 (0.7-<br>0.9) | 0.002 |
|  | Gallstones | 431 (4.2%)       | 471 (4.6%)       | 0.9 (0.8-<br>1.0) | 0.17 | 218 (3.9%)  | 242 (4.3%)  | 0.9 (0.7-<br>1.1) | 0.25  |

Abbreviations: PHP, primary hyperparathyroidism; PTH, parathyroid hormone; MDD, major depressive disorder; HTN, hypertension; GERD, gastroesophageal reflux disease; CI, confidence interval

\*Statistical significance defined as  $P < 0.003$
