# Supplementary material for: Analysis of Time to Diagnosis and Outcomes Among Adults With Primary Hyperparathyroidism
Source: PubMed Central journal article supplement (PMC9857508; doi:10.1001/jamanetworkopen.2022.48332), 2022-12-27
Supplement: jamanetwopen-e2248332-s002.pdf [file jamanetwopen-e2248332-s002.pdf]

## Data Sharing Statement

Lorenz. Analysis of Time to Diagnosis and Outcomes Among Adults With Primary Hyperparathyroidism. *JAMA Netw Open*. Published December 27, 2022.  
doi:10.1001/jamanetworkopen.2022.48332

### Data

**Data available:** Yes

**Data types:** Data dictionary, Other (please specify)

**Additional Information:** Deidentified analyses performed via the TriNetX online platform.

**How to access data:** The data from the current study is available from the author, F. Jeffrey Lorenz ([florenz@pennstatehealth.psu.edu](mailto:florenz@pennstatehealth.psu.edu)), upon reasonable request.

**When available:** With publication

### Supporting Documents

**Document types:** None

### Additional Information

**Who can access the data:** Anyone requesting the data

**Types of analyses:** For any purpose

**Mechanisms of data availability:** With investigator support

**Any additional restrictions:** None
